# Supplementary material for: Novel bidentate N-coordinated alkylaluminum complexes: synthesis, characterization, and efficient catalysis for hydrophosphonylation
Source: Royal Society of Chemistry journal article supplement (doi:10.1039/d3dt04087a), 2024-01-01
Supplement: d3dt04087a1.pdf [file d3dt04087a1.pdf]

**Electronic Supplementary Information for**  
**Novel Bidentate N-coordinated Aluminum Complexes: Synthesis,**  
**Characterization, and Efficient Catalysis for Hydrophosphonylation**

*Biao Wei,<sup>a+</sup> Chaoqun Wang,<sup>a+</sup> Hui Miao<sup>a\*</sup> Zhibiao Qin,<sup>a</sup> Mengna Huang,<sup>a</sup> Yan Xu,<sup>a</sup> Wenhui Xue,<sup>a</sup>  
Shucheng Yang,<sup>a</sup> Chenxu Liu,<sup>a</sup> Cuibing Bai,<sup>a</sup> and Zheng Chen<sup>b\*</sup>*

<sup>a</sup> Anhui Provincial Jointly Constructed Discipline Key Laboratory for Innovative Drug Research and Development and Industry Integration, School of Chemistry and Materials Engineering Fuyang Normal University, Fuyang 236037, P. R. China

<sup>b</sup> Key Laboratory of Functional Molecular Solids, Ministry of Education, College of Chemistry and Materials Science, Anhui Normal University, Wuhu, 241002, China.

\*E-mail: [huimiao@mail.ahnu.edu.cn](mailto:huimiao@mail.ahnu.edu.cn). (Hui Miao); [chenzh07@mail.ahnu.edu.cn](mailto:chenzh07@mail.ahnu.edu.cn). (Zheng Chen)

**Table of Contents**

|                                                                                                             |    |
|-------------------------------------------------------------------------------------------------------------|----|
| I. Synthesis and characterization data of proligands L <sup>1</sup> – L <sup>3</sup> .....                  | 2  |
| II. The <sup>1</sup> H NMR, <sup>13</sup> C NMR spectra of proligands L <sup>1</sup> – L <sup>3</sup> ..... | 4  |
| III. The <sup>1</sup> H NMR, <sup>13</sup> C NMR spectra of Complexes 1-5 .....                             | 7  |
| V. Crystallographic data of Complexes 1-5 .....                                                             | 13 |
| VI. Selected Bond Distances (Å) and Angles (deg) for Complexes 1–5 .....                                    | 14 |
| VII. Spectral data of the hydrophosphination products a-u .....                                             | 15 |
| VIII. The <sup>1</sup> H NMR, <sup>13</sup> C NMR spectra of a-u .....                                      | 22 |
| IX. References .....                                                                                        | 43 |

## I. Synthesis and characterization data of proligands L<sup>1</sup> – L<sup>3</sup>

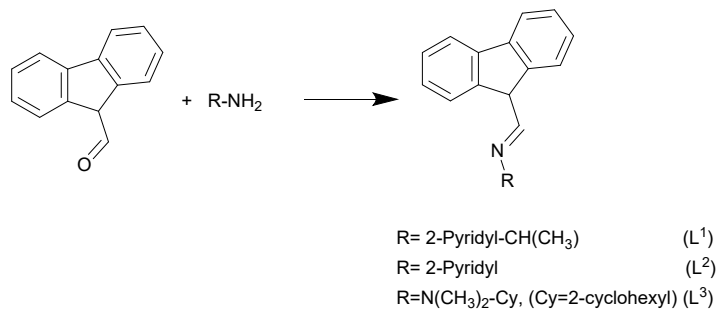

Scheme 1 Preparation of L<sup>1</sup>-L<sup>3</sup>

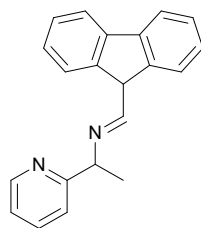

**L<sup>1</sup>** : Add 9-fluorencarboxaldehyde (4.8517 g, 25 mmol) and 1-(2-pyridyl)ethylamine (3.0520 g, 25 mmol) to a 250 mL single-necked flask containing 50 mL of ethanol. Heat the mixture under reflux and monitor the reaction progress using thin-layer chromatography (TLC). After the reaction is complete, remove the ethanol under reduced pressure. The residue is then recrystallized in a mixture of ethyl acetate and petroleum ether, resulting in the precipitation of a white solid L<sup>1</sup>, white powder, 6.6339 g, yield: 89%. <sup>1</sup>H NMR (400 MHz, CDCl<sub>3</sub>, 298 K)  $\delta$  8.76 – 8.67 (m, 1H), 8.00 (d,  $J$  = 7.6 Hz, 1H), 7.92 (d,  $J$  = 7.4 Hz, 1H), 7.84 (d,  $J$  = 7.7 Hz, 1H), 7.72 (td,  $J$  = 7.7, 1.8 Hz, 1H), 7.67 (d,  $J$  = 7.6 Hz, 1H), 7.57–7.46 (m, 2H), 7.41–7.32 (m, 3H), 7.30–7.25 (m, 2H), 6.51 (dd,  $J$  = 13.4, 6.9 Hz, 1H), 4.75 (p,  $J$  = 6.8 Hz, 1H), 1.73 (d,  $J$  = 6.8 Hz, 3H). <sup>13</sup>C NMR (101 MHz, CDCl<sub>3</sub>, 298 K)  $\delta$  161.5, 149.5, 140.1, 137.3, 137.1, 136.4, 135.3, 135.0, 126.2, 125.9, 124.0, 123.3, 122.6, 121.3, 120.8, 120.0, 119.7, 116.8, 107.0, 58.6, 24.4.

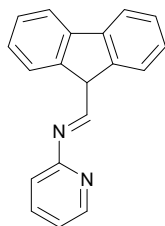

**L<sup>2</sup>** : By reacting 9-fluorencarboxaldehyde (4.8517 g, 25 mmol) with 2-aminopyridine

(2.3528 g, 25 mmol) using the same method as the synthesis of **L**<sup>1</sup>, a yellow-green solid compound named **L**<sup>2</sup> is obtained, yellow-green powder, 6.1452 g, yield: 91%. <sup>1</sup>H NMR (400 MHz, CDCl<sub>3</sub>, 298 K) δ 8.31 (dd, *J* = 4.9, 1.0 Hz, 1H), 8.24 (d, *J* = 12.2 Hz, 1H), 7.90–7.86 (m, 1H), 7.84–7.80 (m, 1H), 7.79–7.75 (m, 1H), 7.74–7.70 (m, 1H), 7.59–7.52 (m, 2H), 7.41–7.36 (m, 2H), 7.33 (td, *J* = 6.9, 1.4 Hz, 2H), 6.87 (ddd, *J* = 7.3, 5.0, 0.9 Hz, 1H), 6.77 (dt, *J* = 8.4, 0.9 Hz, 1H). <sup>13</sup>C NMR (101 MHz, CDCl<sub>3</sub>, 298K) δ 152.8, 148.5, 139.6, 138.8, 138.2, 136.5, 135.8, 126.5, 125.8, 125.1, 124.6, 122.1, 120.2, 119.7, 118.4, 117.2, 112.8, 108.9.

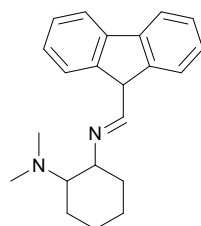

**L**<sup>3</sup> : Synthesize white solid **L**<sup>3</sup> by reacting 9-fluorencarboxaldehyde (4.8517 g, 25 mmol) with (1R,2R)-1-amino-2-(dimethylamino)cyclohexane (3.5550 g, 25 mmol) using the same method as the synthesis of **L**<sup>1</sup>, white powder, 7.3140g, yield: 92%. <sup>1</sup>H NMR (400 MHz, CDCl<sub>3</sub>, 298 K) δ 7.99 (dd, *J* = 7.6, 1.1 Hz, 1H), 7.92 (dd, *J* = 7.6, 1.1 Hz, 1H), 7.72–7.66 (m, 2H), 7.59 (d, *J* = 14.2 Hz, 1H), 7.46–7.40 (m, 1H), 7.37–7.31 (m, 2H), 7.28–7.22 (m, 1H), 7.00 (d, *J* = 14.1 Hz, 1H), 3.12 (dt, *J* = 10.3, 5.1 Hz, 1H), 2.47–2.39 (m, 2H), 2.39–2.34 (m, 6H), 1.95–1.82 (m, 3H), 1.39–1.23 (m, 4H). <sup>13</sup>C NMR (101 MHz, CDCl<sub>3</sub>, 298 K) δ 140.3, 136.8, 136.5, 134.5, 134.4, 126.0, 125.6, 123.3, 122.5, 120.7, 119.8, 119.6, 116.5, 105.6, 67.6, 55.2, 40.1, 31.9, 25.1, 24.3, 20.7.

## II. The $^1\text{H}$ NMR, $^{13}\text{C}$ NMR spectra of proligands $\text{L}^1 - \text{L}^3$

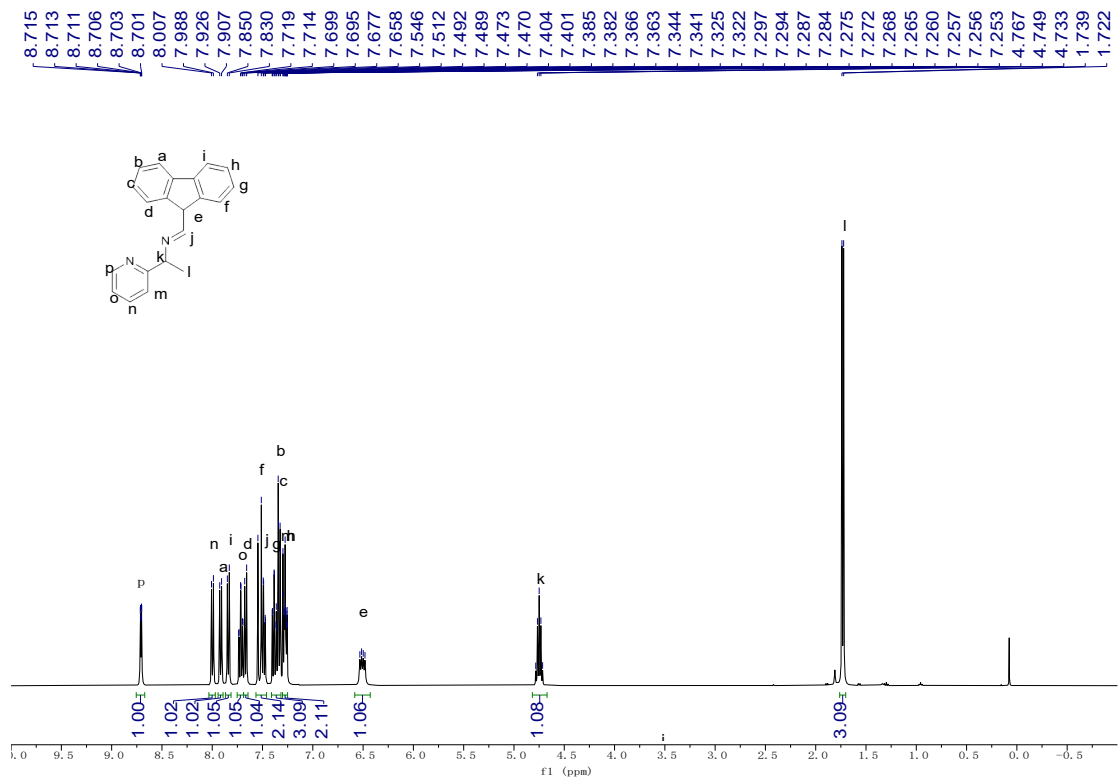

Figure S1.  $^1\text{H}$  NMR (400 MHz,  $\text{CDCl}_3$ ) spectra of  $\text{L}^1$

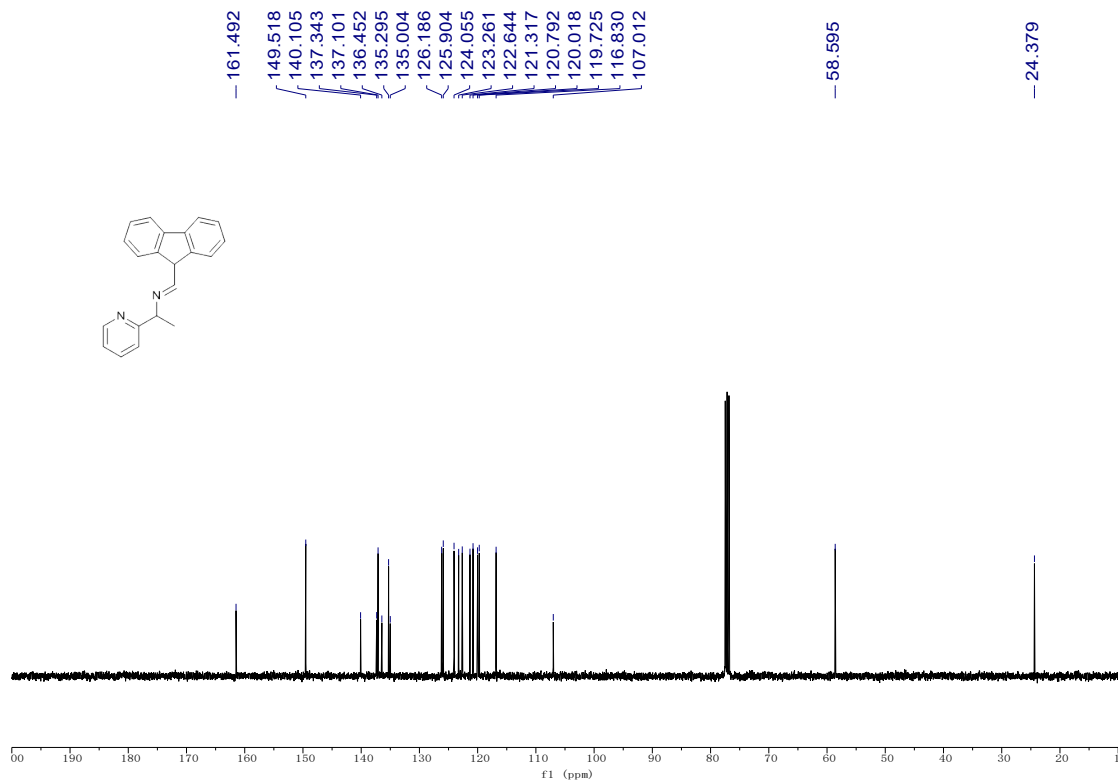

Figure S2.  $^{13}\text{C}$  NMR (101 MHz,  $\text{CDCl}_3$ ) spectra of  $\text{L}^1$

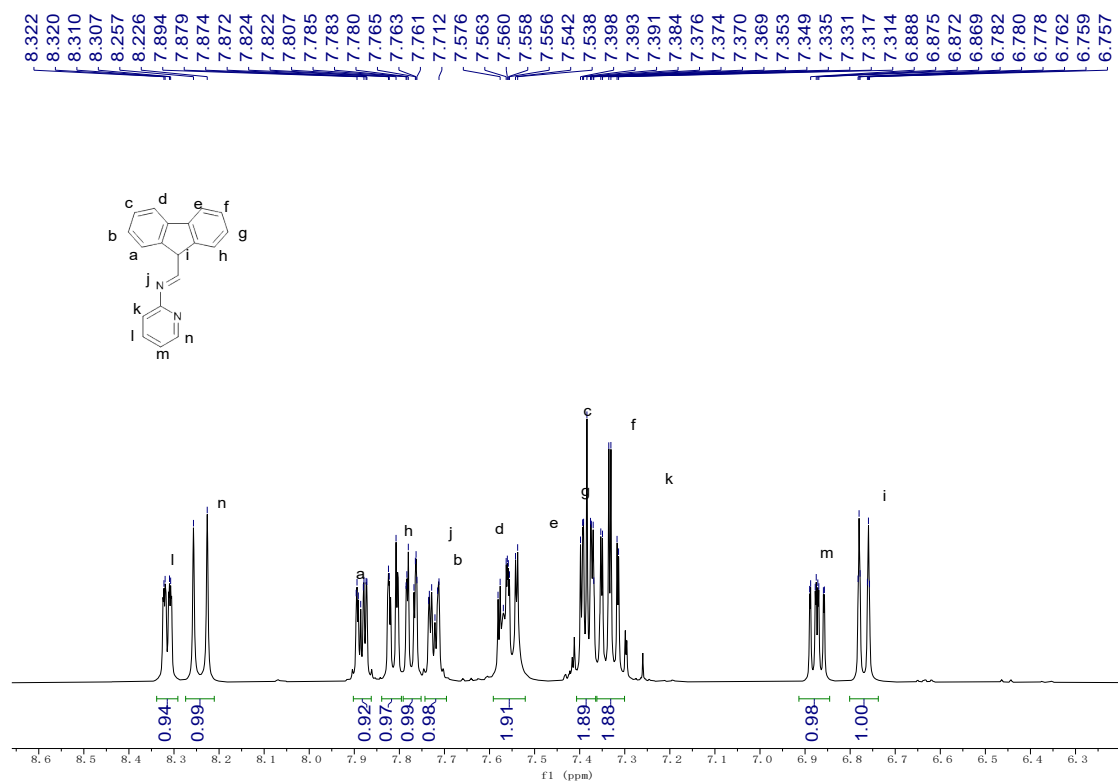

**Figure S3.** <sup>1</sup>H NMR (400 MHz, CDCl<sub>3</sub>) spectra of **L<sup>2</sup>**

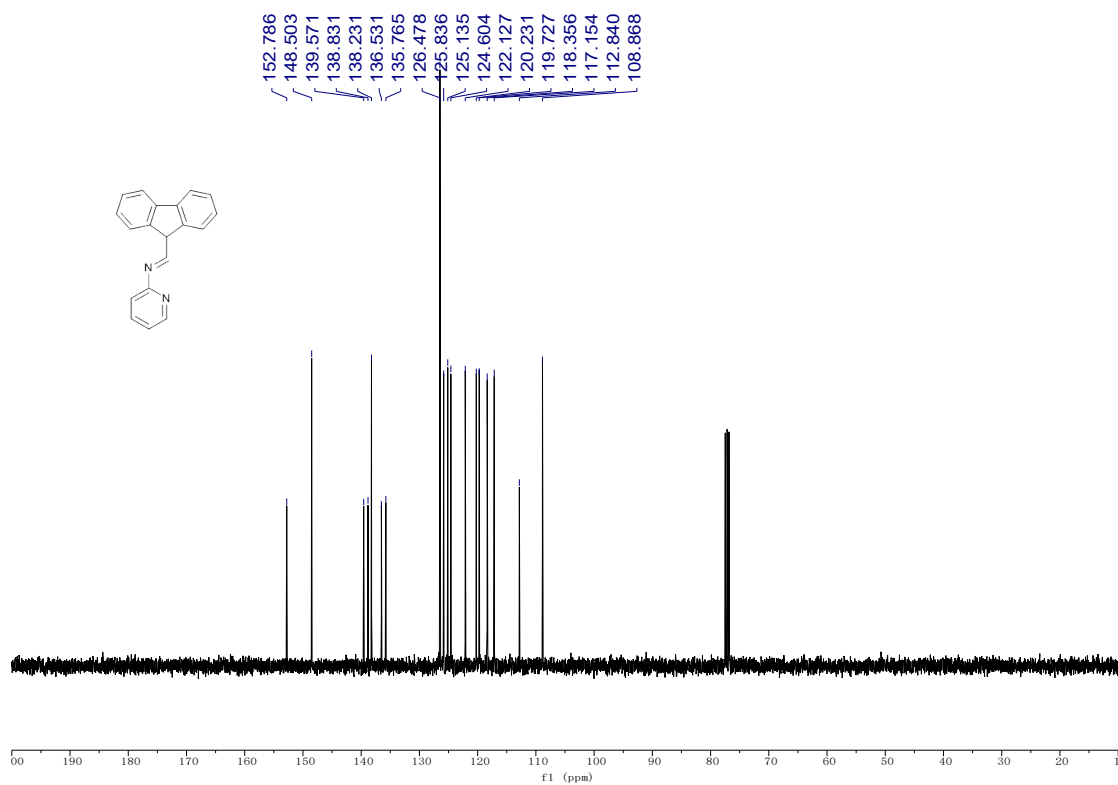

**Figure S4.** <sup>13</sup>C NMR (101 MHz, CDCl<sub>3</sub>) spectra of **L<sup>2</sup>**

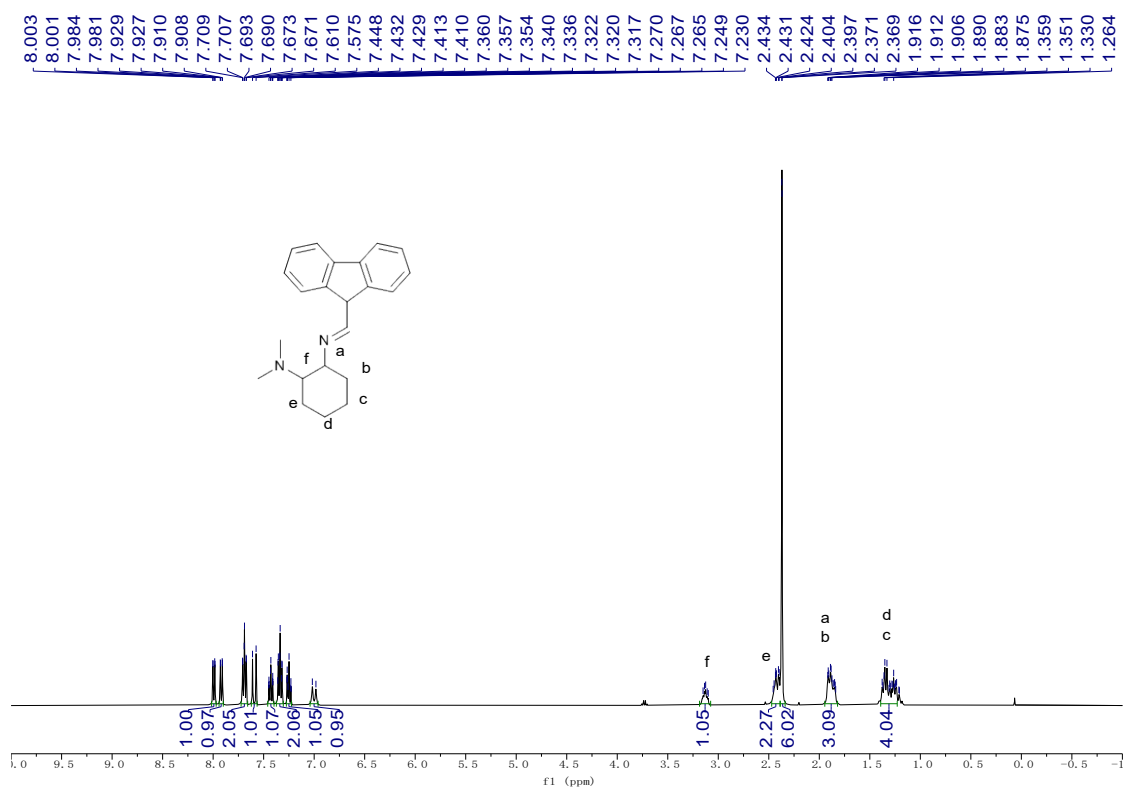

Figure S5.  $^1\text{H}$  NMR (400 MHz,  $\text{CDCl}_3$ ) spectra of  $\text{L}^3$

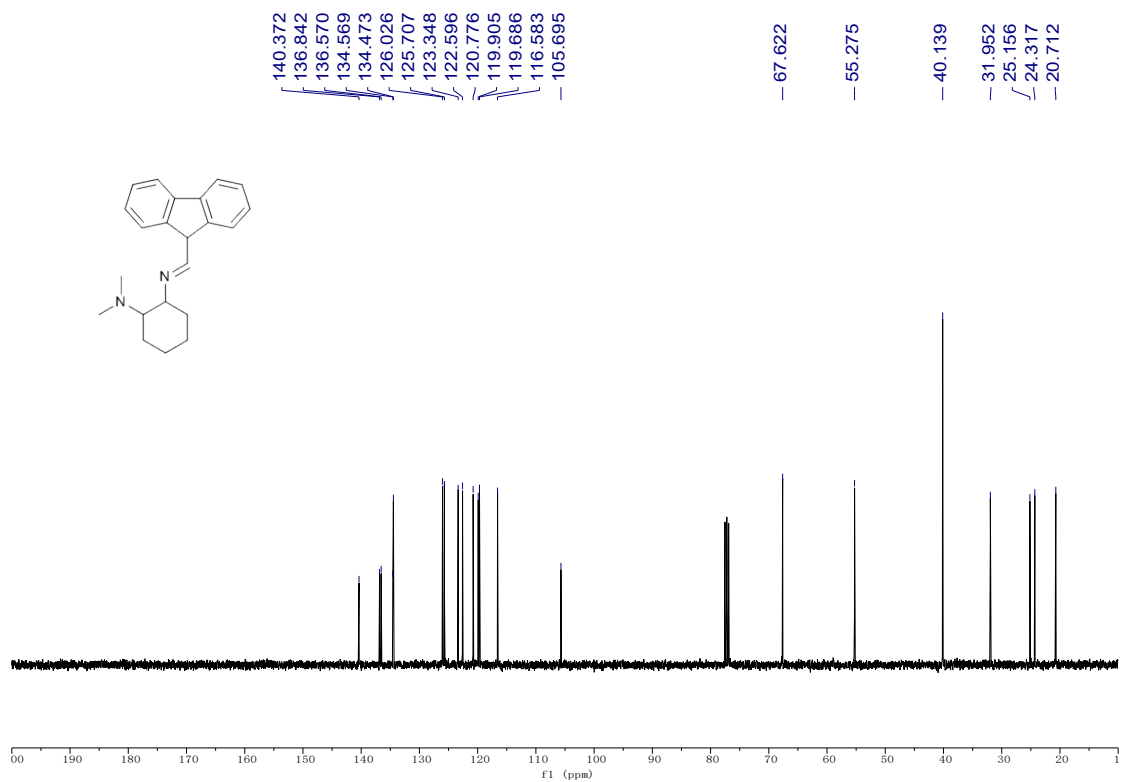

Figure S6.  $^{13}\text{C}$  NMR (101 MHz,  $\text{CDCl}_3$ ) spectra of  $\text{L}^3$

### III. The $^1\text{H}$ NMR, $^{13}\text{C}$ NMR spectra of Complexes 1-5

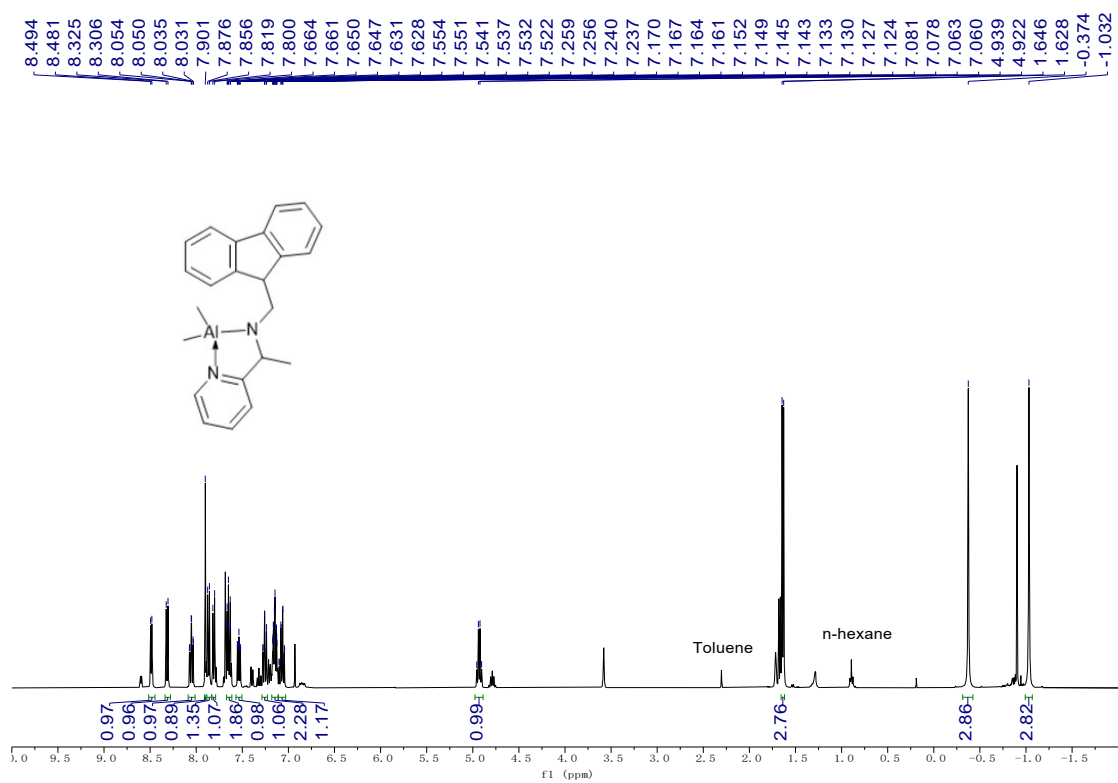

Figure S7.  $^1\text{H}$  NMR (400 MHz,  $\text{THF-}d_8$ ) spectra of Complex 1

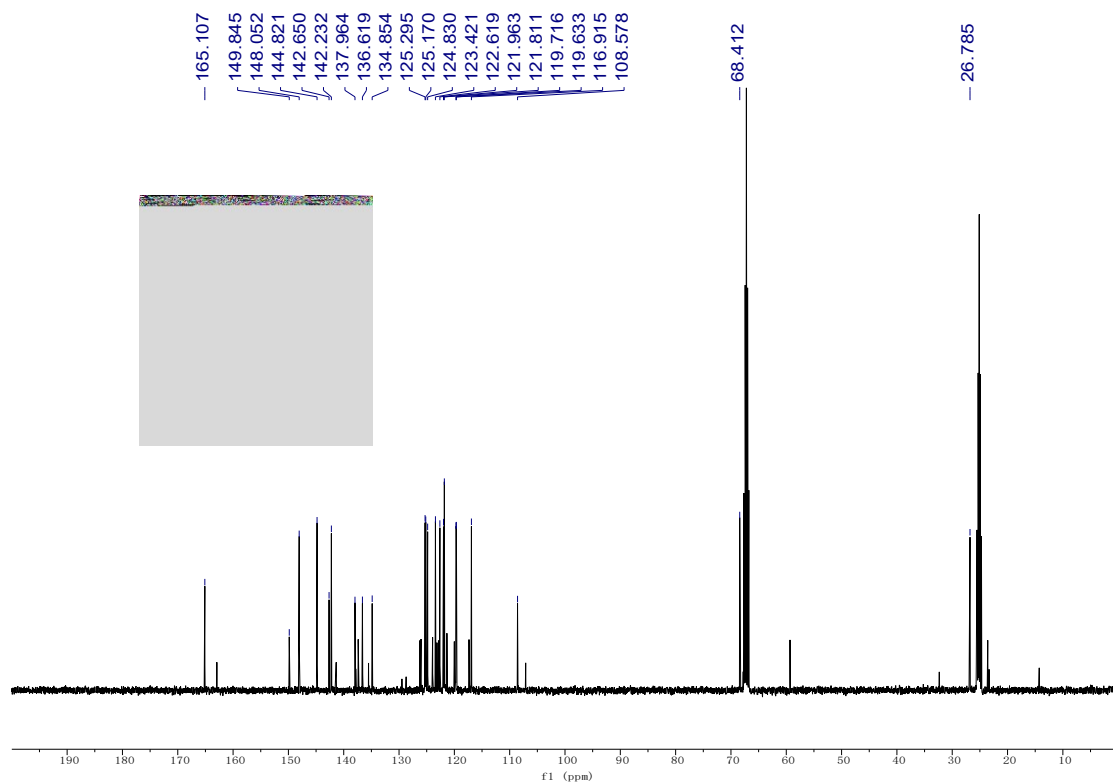

**Figure S8.**  $^{13}\text{C}$  NMR (101 MHz,  $\text{THF-}d_8$ ) spectra of Complex 1

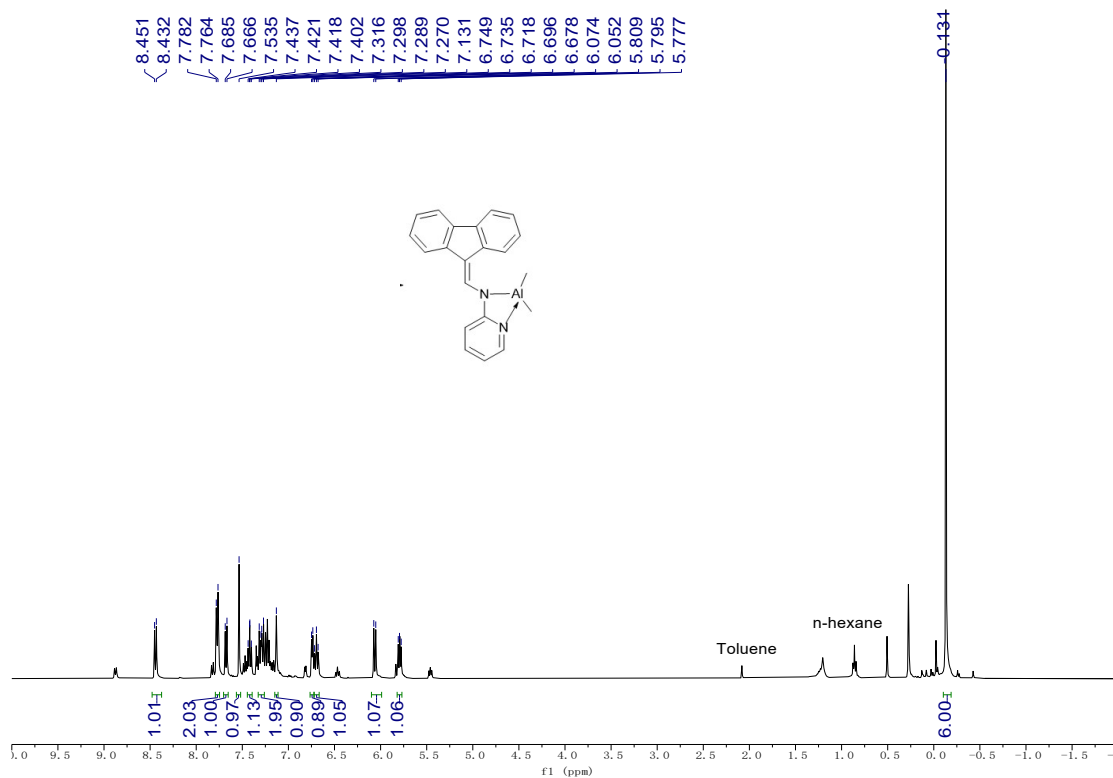

**Figure S9.**  $^1\text{H}$  NMR (400 MHz,  $\text{C}_6\text{D}_6$ ) spectra of Complex 2



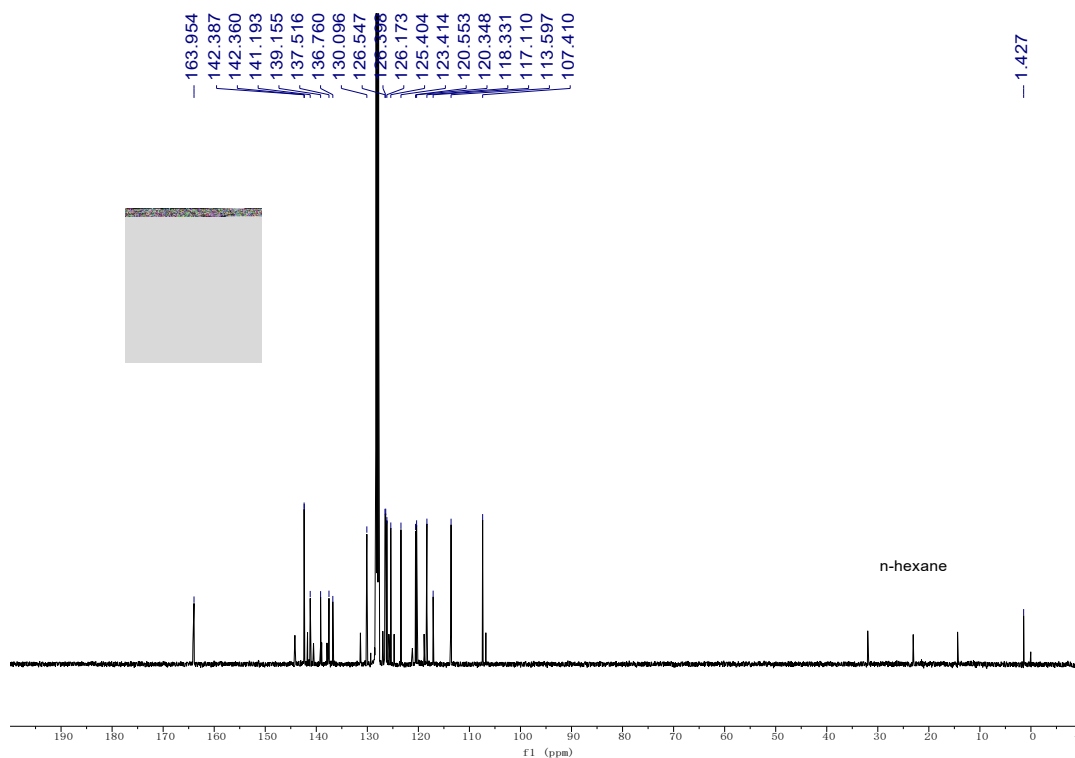

**Figure S10.**  $^{13}\text{C}$  NMR (101 MHz,  $\text{C}_6\text{D}_6$ ) spectra of Complex 2

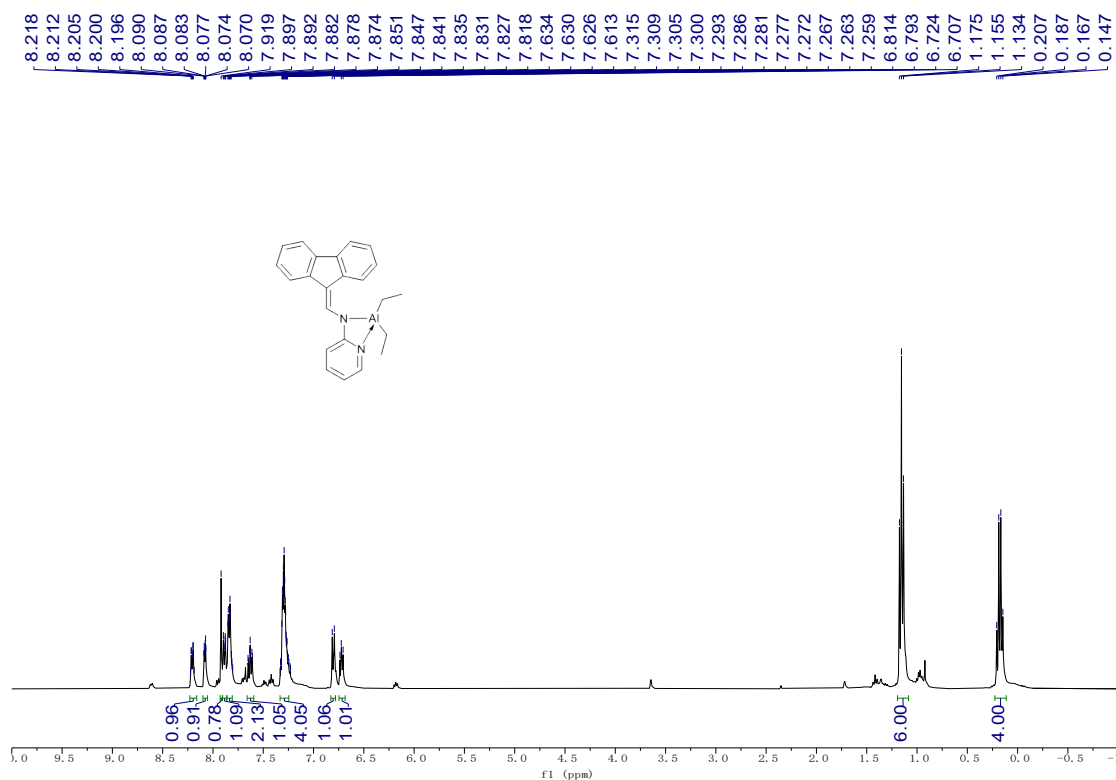

**Figure S11.**  $^1\text{H}$  NMR (400 MHz,  $\text{THF-}d_8$ ) spectra of Complex 3

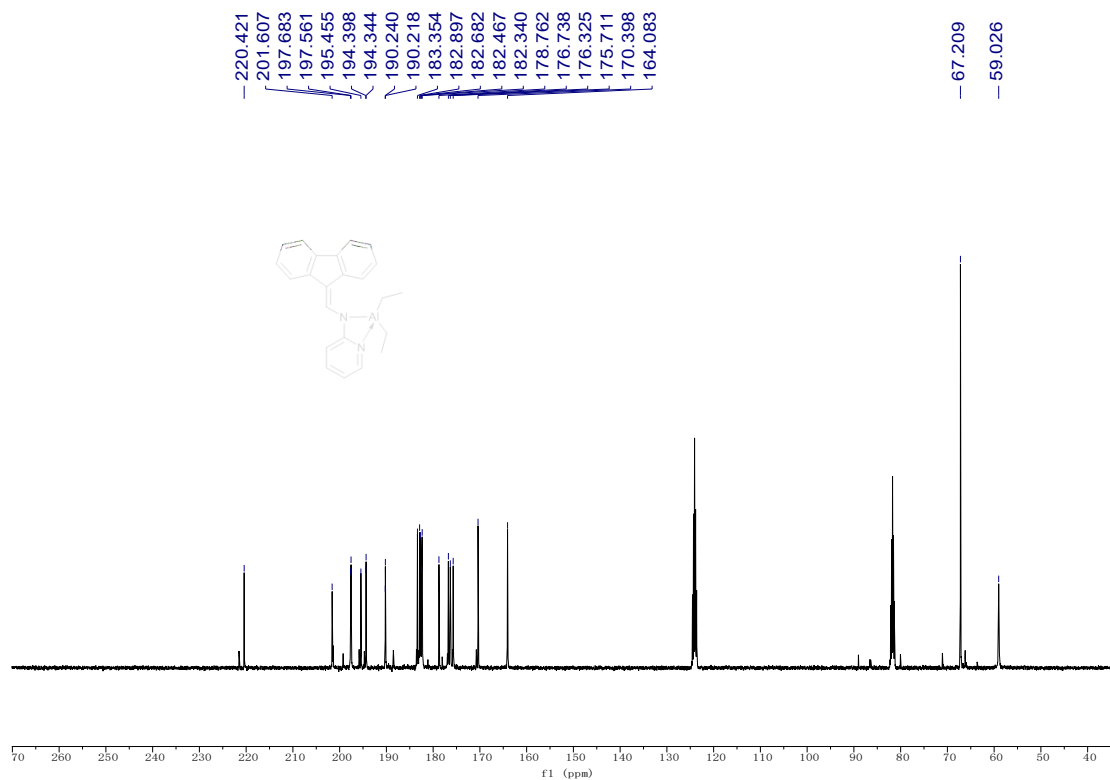

**Figure S12.** <sup>13</sup>C NMR (101 MHz, THF-*d*<sub>8</sub>) spectra of Complex 3

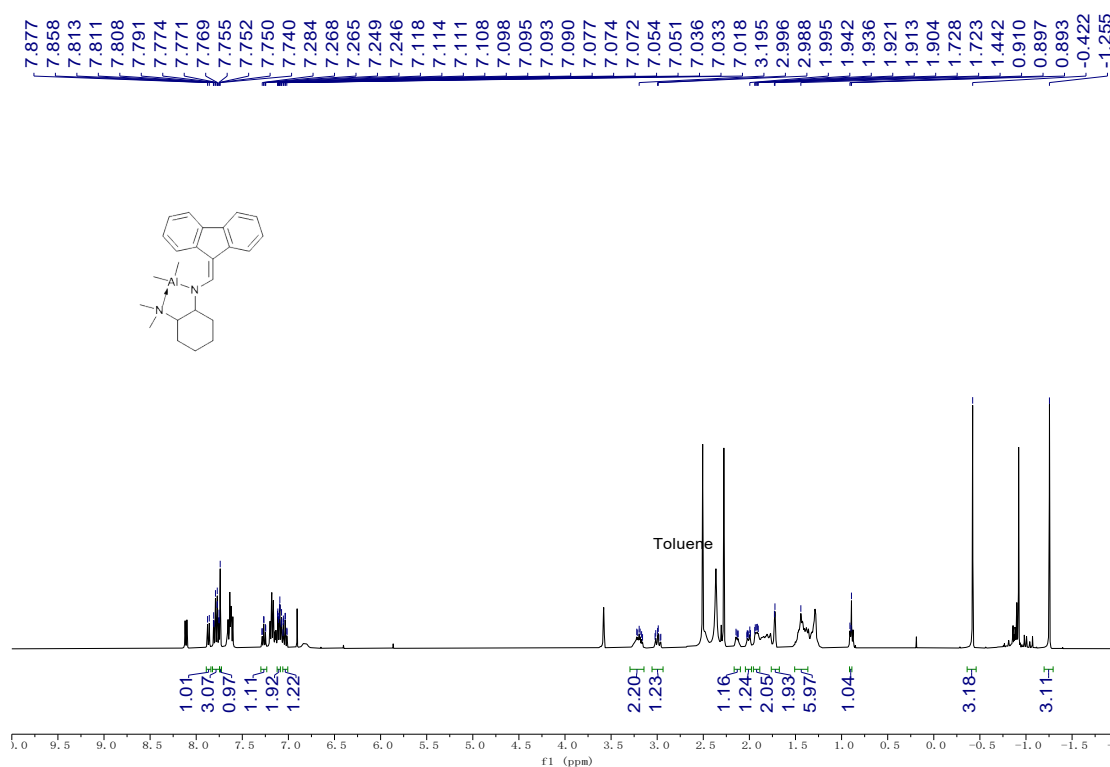

**Figure S13.** <sup>1</sup>H NMR (400 MHz, THF-*d*<sub>8</sub>) spectra of Complex 4

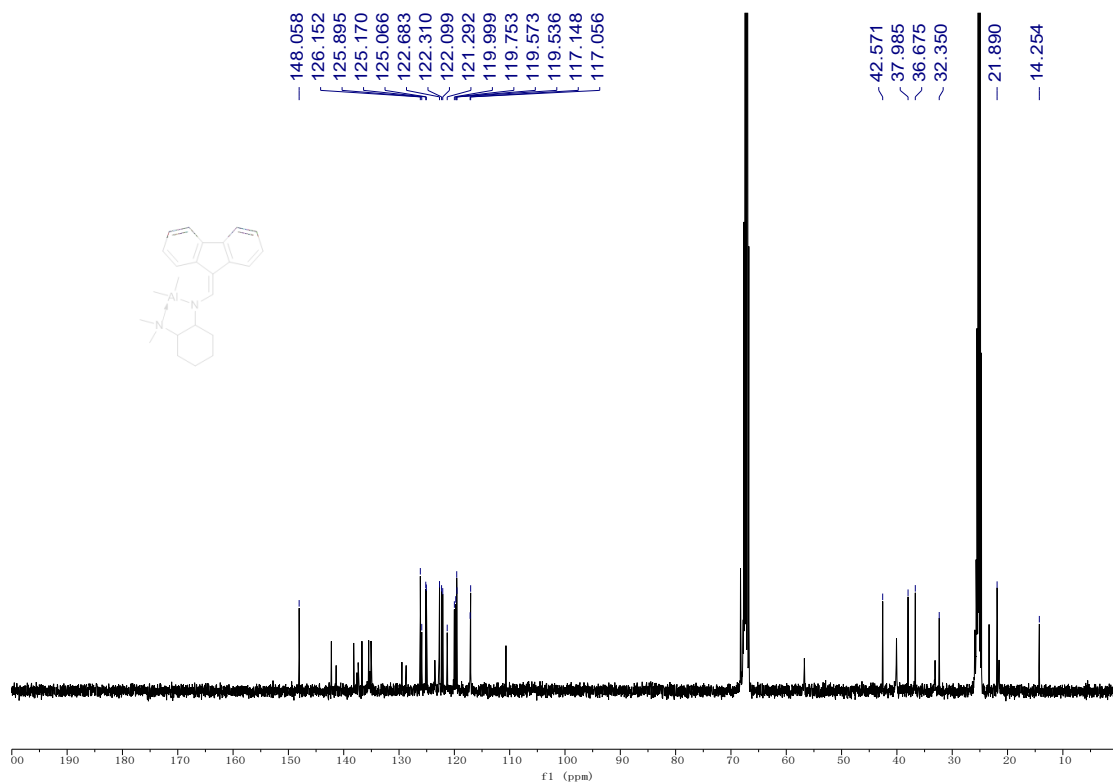

**Figure S14.** <sup>13</sup>C NMR (101 MHz, THF-*d*<sub>8</sub>) spectra of Complex 4

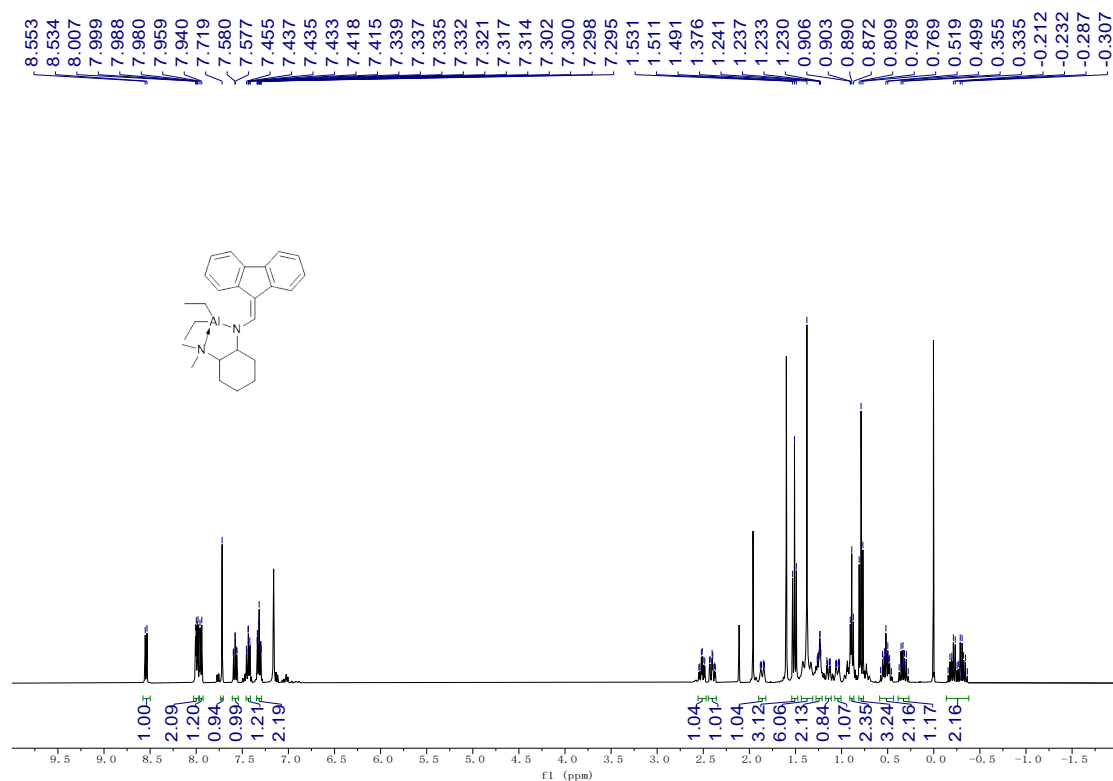

**Figure S15.** <sup>1</sup>H NMR (400 MHz, C<sub>6</sub>D<sub>6</sub>) spectra of Complex 5

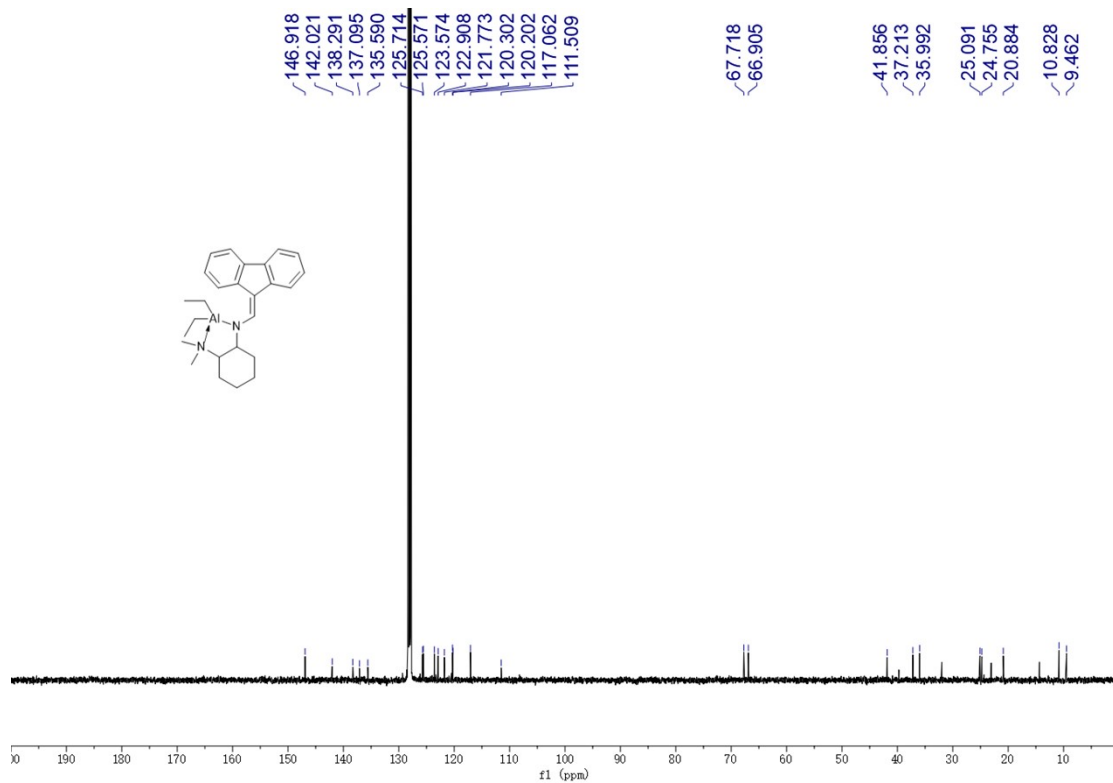

**Figure S16.**  $^{13}\text{C}$  NMR (101 MHz,  $\text{C}_6\text{D}_6$ ) spectra of Complex 5

## V. Crystallographic data of Complexes 1-5

|                                                                                    | 1                                                | 2                                                | 3                                                | 4                                                | 5                                                |
|------------------------------------------------------------------------------------|--------------------------------------------------|--------------------------------------------------|--------------------------------------------------|--------------------------------------------------|--------------------------------------------------|
| Empirical formula                                                                  | C <sub>23</sub> H <sub>23</sub> AlN <sub>2</sub> | C <sub>21</sub> H <sub>19</sub> AlN <sub>2</sub> | C <sub>23</sub> H <sub>23</sub> AlN <sub>2</sub> | C <sub>24</sub> H <sub>31</sub> AlN <sub>2</sub> | C <sub>26</sub> H <sub>35</sub> AlN <sub>2</sub> |
| Formula weight                                                                     | 354.41                                           | 326.36                                           | 354.41                                           | 374.49                                           | 402.54                                           |
| <i>T</i> (K)                                                                       | 293(2)                                           | 293(2)                                           | 293(2)                                           | 293(2)                                           | 293(2)                                           |
| $\lambda$ (Å)                                                                      | 0.71073                                          | 0.71073                                          | 0.71073                                          | 0.71073                                          | 0.71073                                          |
| Crystal system                                                                     | monoclinic                                       | monoclinic                                       | monoclinic                                       | monoclinic                                       | monoclinic                                       |
| Space group                                                                        | <i>I</i> 2/ <i>a</i>                             | <i>P</i> 2 <sub>1</sub> / <i>n</i>               | <i>P</i> 2 <sub>1</sub> / <i>c</i>               | <i>C</i> 2/ <i>c</i>                             | <i>C</i> 2/ <i>c</i>                             |
| <i>a</i> (Å)                                                                       | 16.7984(9)                                       | 12.9752(7)                                       | 8.9561(5)                                        | 23.8578(15)                                      | 23.2371(14)                                      |
| <i>b</i> (Å)                                                                       | 11.7252(5)                                       | 7.9387(4)                                        | 14.6783(8)                                       | 11.8686(6)                                       | 13.1513(6)                                       |
| <i>c</i> (Å)                                                                       | 20.9895(9)                                       | 17.5169(9)                                       | 14.9503(8)                                       | 15.7892(7)                                       | 15.8236(7)                                       |
| $\alpha$ (°)                                                                       | 90                                               | 90                                               | 90                                               | 90                                               | 90                                               |
| $\beta$ (°)                                                                        | 104.505(5)                                       | 94.684(5)                                        | 90.965(4)                                        | 100.681(5)                                       | 100.535(5)                                       |
| $\gamma$ (°)                                                                       | 90                                               | 90                                               | 90                                               | 90                                               | 90                                               |
| <i>V</i> (Å <sup>3</sup> )                                                         | 4002.4(3)                                        | 1798.32(16)                                      | 1965.09(19)                                      | 4393.4(4)                                        | 4754.1(4)                                        |
| <i>Z</i>                                                                           | 8                                                | 4                                                | 4                                                | 8                                                | 8                                                |
| <i>D</i> <sub>calcd</sub> (mg m <sup>-3</sup> )                                    | 1.176                                            | 1.205                                            | 1.198                                            | 1.132                                            | 1.125                                            |
| $\mu$ (mm <sup>-1</sup> )                                                          | 0.109                                            | 0.116                                            | 0.111                                            | 0.103                                            | 0.099                                            |
| <i>F</i> (000)                                                                     | 1504.0                                           | 688.0                                            | 752.0                                            | 1616.0                                           | 1744.0                                           |
| $\theta$ range (°)                                                                 | 4.008 to<br>59.342                               | 4.07 to<br>59.278                                | 3.888 to<br>59.132                               | 4.472 to<br>59.564                               | 4.234 to<br>59.21                                |
| Reflections collected                                                              | 24471                                            | 10961                                            | 12566                                            | 24600                                            | 29338                                            |
| Data/restraints/parameters                                                         | 5057/0/238                                       | 4378/0/219                                       | 4758/0/237                                       | 5576/0/248                                       | 6114/15/266                                      |
| Goodness-of-fit on <i>F</i> <sup>2</sup>                                           | 0.972                                            | 1.074                                            | 0.976                                            | 0.969                                            | 1.053                                            |
| <i>R</i> <sub>1</sub> <i>wR</i> <sub>2</sub> ( <i>I</i> > 2 $\sigma$ ( <i>I</i> )) | 0.0579,<br>0.1510                                | 0.0478,<br>0.1312                                | 0.0620,<br>0.1758                                | 0.0584,<br>0.1714                                | 0.0574,<br>0.1627                                |
| Largest diff peak/hole / e Å <sup>-3</sup>                                         | 0.37/-0.22                                       | 0.21/-0.31                                       | 0.53/-0.49                                       | 0.28/-0.37                                       | 0.28/-0.21                                       |

**VI. Selected Bond Distances (Å) and Angles (deg) for Complexes 1–5**

|                   | 1          | 2          | 3          | 4          | 5          |
|-------------------|------------|------------|------------|------------|------------|
| Al(1)-N(1)        | 1.9040(17) | 1.9548(14) | 1.963(2)   | 1.9088(16) | 1.9109(15) |
| Al(1)-N(2)        | 1.9853(18) | 1.9686(15) | 1.968(2)   | 2.0218(17) | 2.0377(16) |
| N(1)-C(1)         | 1.360(2)   |            |            | 1.359(2)   | 1.355(2)   |
| N(1)-C(6)         |            | 1.365(2)   | 1.364(3)   |            |            |
| Al(1)-C(22)       | 1.947(2)   |            |            |            |            |
| Al(1)-C(23)       | 1.963(2)   |            |            | 1.952(3)   | 1.964(2)   |
| Al(1)-C(24)       |            |            |            | 1.981(3)   | 1.990(2)   |
| Al(1)-C(20)       |            | 1.942(2)   | 1.942(3)   |            |            |
| Al(1)-C(21)       |            | 1.948(2)   | 1.952(3)   |            |            |
| N(1)-Al(1)-N(2)   | 84.18(7)   | 68.40(6)   | 68.37(9)   | 86.50(7)   | 85.68(6)   |
| C(20)-Al(1)-C(21) |            | 120.74(11) | 125.23(14) |            |            |
| N(1)-Al(1)-C(20)  |            | 114.46(8)  | 110.25(12) |            |            |
| N(1)-Al(1)-C(21)  |            | 118.04(9)  | 117.38(13) |            |            |
| N(2)-Al(1)-C(20)  |            | 114.65(9)  | 113.71(13) |            |            |
| N(2)-Al(1)-C(21)  |            | 108.65(8)  | 107.87(12) |            |            |
| C(22)-Al(1)-C(23) | 118.54(10) |            |            |            |            |
| N(1)-Al(1)-C(22)  | 114.22(9)  |            |            |            |            |
| N(1)-Al(1)-C(23)  | 119.62(10) |            |            | 113.68(10) | 115.57(10) |
| N(2)-Al(1)-C(22)  | 109.41(10) |            |            |            |            |
| N(2)-Al(1)-C(23)  | 103.45(9)  |            |            | 111.28(10) | 107.76(9)  |
| N(2)-Al(1)-C(24)  |            |            |            | 103.36(10) | 104.05(8)  |
| C(23)-Al(1)-C(24) |            |            |            | 118.36(13) | 120.85(11) |
| N(1)-Al(1)-C(24)  |            |            |            | 117.91(10) | 115.36(9)  |

## VII. Spectral data of the hydrophosphination products a-u

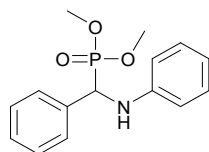

**Dimethyl (phenyl(phenylamino)methyl)phosphonate (a)<sup>1</sup>** : White solid. <sup>1</sup>H NMR (400 MHz, CDCl<sub>3</sub>, 298 K)  $\delta$  7.49 (d,  $J$  = 7.3 Hz, 2H), 7.35 (t,  $J$  = 7.5 Hz, 2H), 7.31–7.25 (m, 1H), 7.16–7.06 (m, 2H), 6.71 (t,  $J$  = 7.3 Hz, 1H), 6.61 (d,  $J$  = 8.0 Hz, 2H), 4.92–4.77 (m, 2H), 3.77 (d,  $J$  = 10.7 Hz, 3H), 3.48 (d,  $J$  = 10.6 Hz, 3H). <sup>13</sup>C NMR (101 MHz, CDCl<sub>3</sub>, 298 K)  $\delta$  146.0, 135.6, 129.2, 128.8, 128.1, 127.9, 118.6, 113.9, 56.4, 54.9, 53.9.

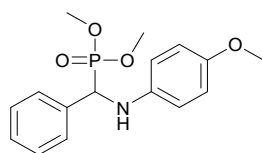

**Dimethyl (((4-methoxyphenyl)amino)(phenyl)methyl)phosphonate (b)<sup>1</sup>** : Light gray solid. <sup>1</sup>H NMR (400 MHz, CDCl<sub>3</sub>, 298 K)  $\delta$  7.46 (d,  $J$  = 7.5 Hz, 2H), 7.32 (t,  $J$  = 7.5 Hz, 2H), 7.26 (dd,  $J$  = 7.3, 1.9 Hz, 1H), 6.68 (d,  $J$  = 8.9 Hz, 2H), 6.55 (d,  $J$  = 8.9 Hz, 2H), 4.80–4.68 (m, 1H), 4.68–4.54 (m, 1H), 3.75 (d,  $J$  = 10.7 Hz, 3H), 3.65 (s, 3H), 3.46 (d,  $J$  = 10.5 Hz, 3H). <sup>13</sup>C NMR (101 MHz, CDCl<sub>3</sub>, 298 K)  $\delta$  152.8, 140.2, 135.8, 128.7, 128.0, 127.9, 115.3, 114.8, 57.4, 55.8, 55.6, 53.8.

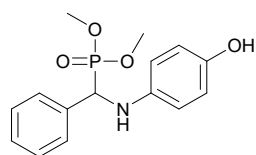

**Dimethyl (((4-hydroxyphenyl)amino)(phenyl)methyl)phosphonate (c)<sup>2</sup>** : Light brown solid. <sup>1</sup>H NMR (400 MHz, CDCl<sub>3</sub>, 298 K)  $\delta$  7.45–7.36 (m, 2H), 7.26 (t,  $J$  = 7.4 Hz, 2H), 7.21 (dd,  $J$  = 7.2, 1.8 Hz, 1H), 6.63 (d,  $J$  = 8.8 Hz, 2H), 6.46 (d,  $J$  = 8.8 Hz, 2H), 4.78–4.66 (m, 1H), 4.55 (s, 1H), 3.69 (d,  $J$  = 10.7 Hz, 3H), 3.43 (d,  $J$  = 10.6 Hz, 3H). <sup>13</sup>C NMR (101 MHz, CDCl<sub>3</sub>, 298 K)  $\delta$  149.7, 138.8, 135.4, 128.4, 127.7, 127.6, 115.8, 57.1, 55.6, 53.8, 53.5.

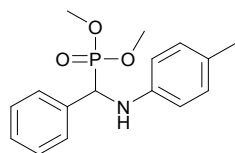

**Dimethyl (phenyl(p-tolylamino)methyl)phosphonate (d)<sup>3</sup>** : White solid. <sup>1</sup>H NMR (400 MHz, CDCl<sub>3</sub>, 298 K)  $\delta$  7.47 (d,  $J$  = 7.6 Hz, 2H), 7.34 (t,  $J$  = 7.7 Hz, 2H), 7.27 (t,  $J$  = 6.6 Hz, 1H), 6.91 (d,  $J$  = 8.4 Hz, 2H), 6.52 (d,  $J$  = 8.4 Hz, 2H), 4.85–4.74 (m, 1H), 4.41 (s, 1H), 3.76 (d,  $J$  = 10.6 Hz, 3H), 3.47 (d,  $J$  = 10.6 Hz, 3H), 2.18 (s, 3H). <sup>13</sup>C NMR (101 MHz, CDCl<sub>3</sub>, 298 K)  $\delta$  143.7, 135.7, 129.7, 128.8, 128.0, 127.8, 114.0, 56.7, 55.2, 53.7, 20.4.

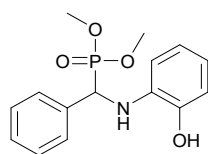

**Dimethyl (((2-hydroxyphenyl)amino)(phenyl)methyl)phosphonate (e)<sup>4</sup>** : Light brown solid. <sup>1</sup>H NMR (400 MHz, CDCl<sub>3</sub>, 298 K)  $\delta$  9.09 (s, 1H), 7.45 (dd,  $J$  = 5.2, 2.3 Hz, 2H), 7.18 (dd,  $J$  = 5.3, 1.8 Hz, 3H), 6.80 (d,  $J$  = 6.3 Hz, 1H), 6.66 (t,  $J$  = 7.0 Hz, 1H), 6.56 (t,  $J$  = 6.8 Hz, 1H), 6.52 (d,  $J$  = 8.1 Hz, 1H), 5.80–5.66 (m, 1H), 5.03–4.88 (m, 1H), 3.89 (d,  $J$  = 10.7 Hz, 3H), 3.46 (d,  $J$  = 10.6 Hz, 3H). <sup>13</sup>C NMR (101 MHz, CDCl<sub>3</sub>, 298 K)  $\delta$  145.3, 135.5, 134.9, 128.7, 128.1, 120.0, 118.5, 114.5, 112.1, 56.6, 55.0, 54.8, 54.1.

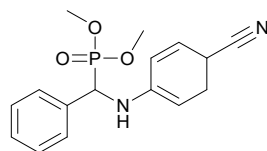

**Dimethyl (((4-cyanophenyl)amino)(phenyl)methyl)phosphonate (f)<sup>3</sup>** : Yellowish solid. <sup>1</sup>H NMR (400 MHz, CDCl<sub>3</sub>, 298 K)  $\delta$  7.45 (d,  $J$  = 7.7 Hz, 2H), 7.33 (dd,  $J$  = 8.3, 2.9 Hz, 5H), 6.60 (d,  $J$  = 8.8 Hz, 2H), 5.78 (s, 1H), 4.89–4.72 (m, 1H), 3.76 (d,  $J$  = 10.9 Hz, 3H), 3.44 (d,  $J$  = 10.6 Hz, 3H). <sup>13</sup>C NMR (101 MHz, CDCl<sub>3</sub>, 298 K)  $\delta$  149.8, 134.6, 133.6, 129.0, 128.6, 127.8, 120.1, 113.5, 100.2, 55.7, 54.2, 53.8.

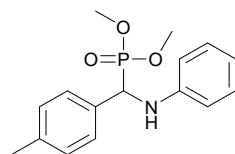



**Dimethyl ((phenylamino)(p-tolyl)methyl)phosphonate (g)<sup>1</sup>** : White solid. <sup>1</sup>H NMR (400 MHz, CDCl<sub>3</sub>, 298 K)  $\delta$  7.37 (d,  $J$  = 5.9 Hz, 2H), 7.16 (d,  $J$  = 7.8 Hz, 2H), 7.11 (d,  $J$  = 15.8 Hz, 2H), 6.70 (t,  $J$  = 7.3 Hz, 1H), 6.62 (d,  $J$  = 8.0 Hz, 2H), 4.95–4.69 (m, 2H), 3.77 (d,  $J$  = 10.7 Hz, 3H), 3.49 (d,  $J$  = 10.6 Hz, 3H), 2.32 (s, 3H). <sup>13</sup>C NMR (101 MHz, CDCl<sub>3</sub>, 298 K)  $\delta$  146.2, 137.8, 132.5, 132.4, 129.5, 129.2, 127.7, 118.5, 113.9, 56.1, 54.6, 53.8, 21.2.

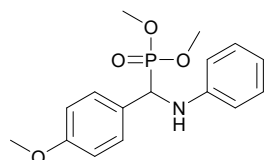

**Dimethyl ((4-methoxyphenyl)(phenylamino)methyl)phosphonate (h)<sup>1</sup>** : Yellow solid. <sup>1</sup>H NMR (400 MHz, CDCl<sub>3</sub>, 298 K)  $\delta$  7.39 (d,  $J$  = 6.5 Hz, 2H), 7.11 (t,  $J$  = 7.7 Hz, 2H), 6.88 (d,  $J$  = 8.3 Hz, 2H), 6.70 (t,  $J$  = 7.4 Hz, 1H), 6.60 (d,  $J$  = 8.0 Hz, 2H), 4.83–4.67 (m, 2H), 3.76 (d,  $J$  = 10.0 Hz, 6H), 3.49 (d,  $J$  = 10.4 Hz, 3H). <sup>13</sup>C NMR (101 MHz, CDCl<sub>3</sub>, 298 K)  $\delta$  159.5, 146.3, 129.3, 129.0, 127.4, 118.6, 114.3, 114.0, 55.8, 55.3, 54.3, 53.9.

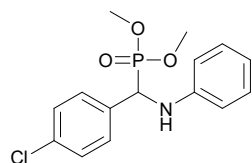

**Dimethyl ((4-chlorophenyl)(phenylamino)methyl)phosphonate (i)<sup>2</sup>** : Yellow solid. <sup>1</sup>H NMR (400 MHz, CDCl<sub>3</sub>, 298 K)  $\delta$  7.42 (d,  $J$  = 6.2 Hz, 2H), 7.32 (d,  $J$  = 8.5 Hz, 2H), 7.20–7.05 (m, 2H), 6.72 (t,  $J$  = 7.3 Hz, 1H), 6.58 (d,  $J$  = 7.7 Hz, 2H), 5.00–4.69 (m, 2H), 3.77 (d,  $J$  = 10.7 Hz, 3H), 3.55 (d,  $J$  = 10.6 Hz, 3H). <sup>13</sup>C NMR (101 MHz, CDCl<sub>3</sub>, 298 K)  $\delta$  145.9, 134.3, 133.9, 129.3, 129.2, 129.0, 118.9, 113.9, 55.9, 54.4, 54.0.

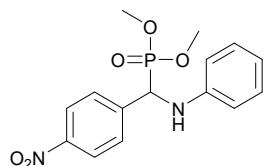

**Dimethyl ((4-nitrophenyl)(phenylamino)methyl)phosphonate (j)<sup>1</sup>** : Yellow solid. <sup>1</sup>H NMR (400 MHz, CDCl<sub>3</sub>, 298 K)  $\delta$  8.20 (d,  $J$  = 7.9 Hz, 2H), 7.66 (dd,  $J$  = 8.9, 2.4 Hz, 2H), 7.19–7.04 (m, 2H), 6.73 (t,  $J$  = 7.4 Hz, 1H), 6.54 (d,  $J$  = 7.5 Hz, 2H), 5.10–4.82 (m, 2H), 3.80 (d,  $J$  = 10.7 Hz, 3H), 3.62 (d,  $J$  = 10.8 Hz, 3H). <sup>13</sup>C NMR (101 MHz,

CDCl<sub>3</sub>, 298 K)  $\delta$  147.7, 145.4, 143.8, 129.5, 128.7, 124.0, 119.3, 113.9, 56.3, 54.8, 54.3, 54.0.

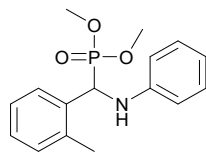

**Dimethyl ((phenylamino)(o-tolyl)methyl)phosphonate (k)<sup>1</sup>** : Light brown solid. <sup>1</sup>H NMR (400 MHz, CDCl<sub>3</sub>, 298 K)  $\delta$  7.55–7.48 (m, 1H), 7.21–7.12 (m, 3H), 7.09 (d, *J* = 7.3 Hz, 2H), 6.69 (t, *J* = 7.3 Hz, 1H), 6.54 (d, *J* = 7.6 Hz, 2H), 5.09–4.98 (m, 1H), 4.88 (t, *J* = 8.8 Hz, 1H), 3.78 (d, *J* = 10.8 Hz, 3H), 3.38 (d, *J* = 10.5 Hz, 3H), 2.52 (s, 3H). <sup>13</sup>C NMR (101 MHz, CDCl<sub>3</sub>, 298 K)  $\delta$  146.0, 136.3, 133.9, 130.7, 129.3, 128.0, 127.2, 126.7, 118.5, 113.6, 53.9, 52.5, 51.0, 19.8.

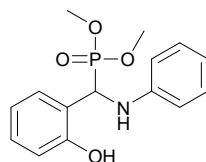

**Dimethyl ((2-hydroxyphenyl)(phenylamino)methyl)phosphonate (l)<sup>1</sup>** : White solid. <sup>1</sup>H NMR (400 MHz, CDCl<sub>3</sub>, 298 K)  $\delta$  8.98 (s, 1H), 7.27 (d, *J* = 7.2 Hz, 1H), 7.13 (t, *J* = 7.6 Hz, 3H), 6.95 (d, *J* = 8.1 Hz, 1H), 6.88 (d, *J* = 7.5 Hz, 1H), 6.75 (d, *J* = 7.4 Hz, 1H), 6.69 (d, *J* = 7.9 Hz, 2H), 5.20–5.01 (m, 1H), 4.79 (t, *J* = 7.7 Hz, 1H), 3.76 (d, *J* = 10.5 Hz, 3H), 3.65 (d, *J* = 10.6 Hz, 3H). <sup>13</sup>C NMR (101 MHz, CDCl<sub>3</sub>, 298 K)  $\delta$  155.7, 146.1, 129.6, 129.4, 129.0, 121.4, 120.8, 119.5, 118.2, 114.5, 54.6, 54.0, 52.4.

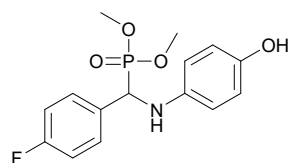

**Dimethyl ((4-fluorophenyl)((4-hydroxyphenyl)amino)methyl)phosphonate (m)** : Yellowish solid. <sup>1</sup>H NMR (400 MHz, CDCl<sub>3</sub>, 298 K)  $\delta$  7.21 (d, *J* = 6.3 Hz, 2H), 6.77 (t, *J* = 8.3 Hz, 4H), 6.60–6.52 (m, 2H), 6.46 (s, 3H), 4.79–4.56 (m, 1H), 3.74 (d, *J* = 10.7 Hz, 3H), 3.67 (d, *J* = 12.2 Hz, 1H), 3.48 (d, *J* = 10.5 Hz, 3H). <sup>13</sup>C NMR (101 MHz, CDCl<sub>3</sub>, 298 K)  $\delta$  157.7, 157.1, 155.3, 142.3, 142.1, 129.0, 125.3, 116.1, 115.8, 115.3, 56.5, 54.9, 54.2.

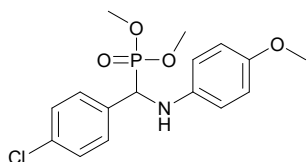

**Dimethyl ((4-chlorophenyl)((4-methoxyphenyl)amino)methyl)phosphonate (n) :**

Gray solid.  $^1\text{H}$  NMR (400 MHz,  $\text{CDCl}_3$ , 298 K)  $\delta$  7.40 (dd,  $J = 8.6, 2.4$  Hz, 2H), 7.30 (d,  $J = 8.6$  Hz, 2H), 6.68 (d,  $J = 9.0$  Hz, 2H), 6.52 (d,  $J = 9.0$  Hz, 2H), 4.84–4.49 (m, 2H), 3.76 (d,  $J = 10.7$  Hz, 3H), 3.67 (s, 3H), 3.54 (d,  $J = 10.6$  Hz, 3H).  $^{13}\text{C}$  NMR (101 MHz,  $\text{CDCl}_3$ , 298 K)  $\delta$  152.9, 139.8, 134.5, 133.8, 129.2, 128.9, 115.3, 114.8, 56.8, 55.6, 55.3, 54.0, 53.8.

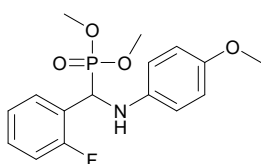

**Dimethyl ((2-fluorophenyl)((4-methoxyphenyl)amino)methyl)phosphonate (o) :**

White solid.  $^1\text{H}$  NMR (400 MHz,  $\text{CDCl}_3$ , 298 K)  $\delta$  7.56 (t,  $J = 7.6$  Hz, 1H), 7.33–7.22 (m, 1H), 7.21–7.03 (m, 2H), 6.73 (d,  $J = 9.0$  Hz, 2H), 6.62 (d,  $J = 9.0$  Hz, 2H), 5.36–5.04 (m, 1H), 4.67 (s, 1H), 3.87 (d,  $J = 10.7$  Hz, 3H), 3.70 (s, 3H), 3.55 (d,  $J = 10.6$  Hz, 3H).  $^{13}\text{C}$  NMR (101 MHz,  $\text{CDCl}_3$ , 298 K)  $\delta$  152.9, 139.7, 129.7, 128.9, 124.7, 123.3, 115.2, 115.1, 114.8, 55.6, 54.0, 53.8, 49.4, 47.8.

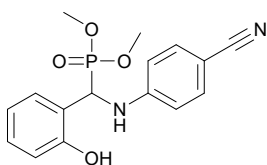

**Dimethyl (((4-cyanophenyl)amino)(2-hydroxyphenyl)methyl)phosphonate (p) :**

White solid.  $^1\text{H}$  NMR (400 MHz,  $\text{CDCl}_3$ , 298 K)  $\delta$  8.52 (s, 1H), 7.37 (d,  $J = 8.3$  Hz, 2H), 7.23 (d,  $J = 7.6$  Hz, 1H), 7.15 (t,  $J = 7.7$  Hz, 1H), 6.99–6.78 (m, 2H), 6.63 (d,  $J = 8.4$  Hz, 2H), 5.42 (t,  $J = 7.2$  Hz, 1H), 5.29–5.07 (m, 1H), 3.78 (d,  $J = 10.6$  Hz, 3H), 3.65 (d,  $J = 10.6$  Hz, 3H).  $^{13}\text{C}$  NMR (101 MHz,  $\text{CDCl}_3$ , 298 K)  $\delta$  155.2, 149.7, 133.8, 130.1, 128.8, 121.0, 120.9, 120.1, 118.0, 113.5, 100.6, 54.5, 54.2, 29.8.

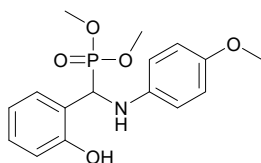

**Dimethyl ((2-hydroxyphenyl)((4-methoxyphenyl)amino)methyl)phosphonate (q) :**

White solid.  $^1\text{H}$  NMR (400 MHz,  $\text{CDCl}_3$ , 298 K)  $\delta$  9.15 (s, 1H), 7.20 (d,  $J = 7.6$  Hz, 1H), 7.16 (t,  $J = 7.8$  Hz, 1H), 6.90 (d,  $J = 8.1$  Hz, 1H), 6.86 (t,  $J = 7.7$  Hz, 1H), 6.69 (q,  $J = 9.1$  Hz, 4H), 4.96–4.83 (m, 1H), 4.53 (s, 1H), 3.75 (d,  $J = 10.6$  Hz, 3H), 3.68 (d,  $J = 10.6$  Hz, 6H).  $^{13}\text{C}$  NMR (101 MHz,  $\text{CDCl}_3$ , 298 K)  $\delta$  156.2, 156.2, 153.9, 139.9, 129.7, 129.2, 120.6, 118.2, 116.8, 114.8, 55.7, 54.5, 54.0.

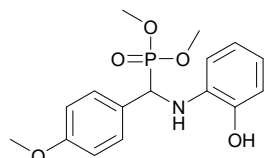

**Dimethyl (((2-hydroxyphenyl)amino)(4-methoxyphenyl)methyl)phosphonate (r)<sup>4</sup> :**

Light gray solid.  $^1\text{H}$  NMR (400 MHz,  $\text{CDCl}_3$ , 298 K)  $\delta$  9.29 (s, 1H), 7.35 (d,  $J = 5.8$  Hz, 2H), 7.01 (d,  $J = 7.8$  Hz, 2H), 6.83 (d,  $J = 6.2$  Hz, 1H), 6.68 (t,  $J = 6.9$  Hz, 1H), 6.62–6.52 (m, 2H), 5.76 (s, 1H), 5.02–4.88 (m, 1H), 3.91 (d,  $J = 10.7$  Hz, 3H), 3.50 (d,  $J = 10.5$  Hz, 3H), 2.27 (s, 3H).  $^{13}\text{C}$  NMR (101 MHz,  $\text{CDCl}_3$ , 298 K)  $\delta$  145.3, 137.8, 134.9, 132.3, 129.4, 127.9, 119.9, 118.4, 114.4, 111.9, 56.2, 54.8, 54.1, 21.2.

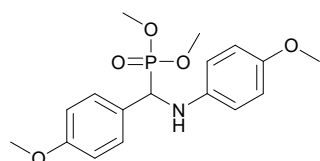

**Dimethyl ((4-methoxyphenyl)((4-methoxyphenyl)amino)methyl)phosphonate (s)<sup>5</sup> :**

White solid.  $^1\text{H}$  NMR (400 MHz,  $\text{CDCl}_3$ , 298 K)  $\delta$  7.06 (d,  $J = 6.3$  Hz, 2H), 6.51 (d,  $J = 8.2$  Hz, 2H), 6.38–6.19 (m, 4H), 4.48 (t,  $J = 8.3$  Hz, 1H), 4.44–4.33 (m, 1H), 3.37 (s, 6H), 3.29 (d,  $J = 2.5$  Hz, 3H), 3.15 (d,  $J = 10.5$  Hz, 3H).  $^{13}\text{C}$  NMR (101 MHz,  $\text{CDCl}_3$ , 298 K)  $\delta$  159.2, 152.5, 140.2, 128.9, 127.5, 115.2, 114.5, 113.9, 56.4, 55.3, 55.0, 53.5.

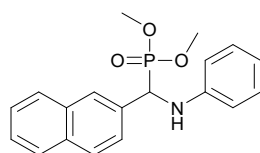

**Dimethyl (naphthalen-2-yl(phenylamino)methyl)phosphonate (t)<sup>1</sup> :** White solid.  $^1\text{H}$

NMR (400 MHz,  $\text{CDCl}_3$ , 298 K)  $\delta$  8.25 (d,  $J = 8.5$  Hz, 1H), 7.91 (d,  $J = 9.8$  Hz, 1H), 7.86–7.77 (m, 2H), 7.64 (t,  $J = 6.9$  Hz, 1H), 7.55 (t,  $J = 7.5$  Hz, 1H), 7.46 (t,  $J = 7.8$  Hz, 1H), 7.11–6.91 (m, 2H), 6.67 (t,  $J = 7.3$  Hz, 1H), 6.57 (d,  $J = 7.6$  Hz, 2H), 5.84–5.59 (m, 1H), 5.15 (t,  $J = 8.8$  Hz, 1H), 3.83 (d,  $J = 10.8$  Hz, 3H), 3.16 (d,  $J = 10.5$  Hz, 3H).

$^{13}\text{C}$  NMR (101 MHz,  $\text{CDCl}_3$ , 298 K)  $\delta$  146.0, 133.9, 131.4, 129.3, 129.2, 128.7, 126.6, 125.8, 125.7, 125.6, 122.6, 118.5, 113.6, 53.7, 51.9, 50.4.

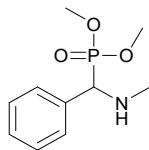

**Dimethyl ((methylamino)(phenyl)methyl)phosphonate (u)** : White solid.  $^1\text{H}$  NMR (400 MHz,  $\text{CDCl}_3$ , 298 K)  $\delta$  7.42–7.33 (m, 4H), 7.31 (d,  $J = 7.5$  Hz, 1H), 4.00–3.88 (m, 1H), 3.71 (d,  $J = 10.6$  Hz, 3H), 3.54 (d,  $J = 10.4$  Hz, 3H), 2.32 (s, 3H), 1.99 (s, 1H).  $^{13}\text{C}$  NMR (101 MHz,  $\text{CDCl}_3$ , 298 K)  $\delta$  128.7, 128.5, 128.2, 63.4, 61.8, 53.5, 35.1.

## VIII. The $^1\text{H}$ NMR, $^{13}\text{C}$ NMR spectra of a-u

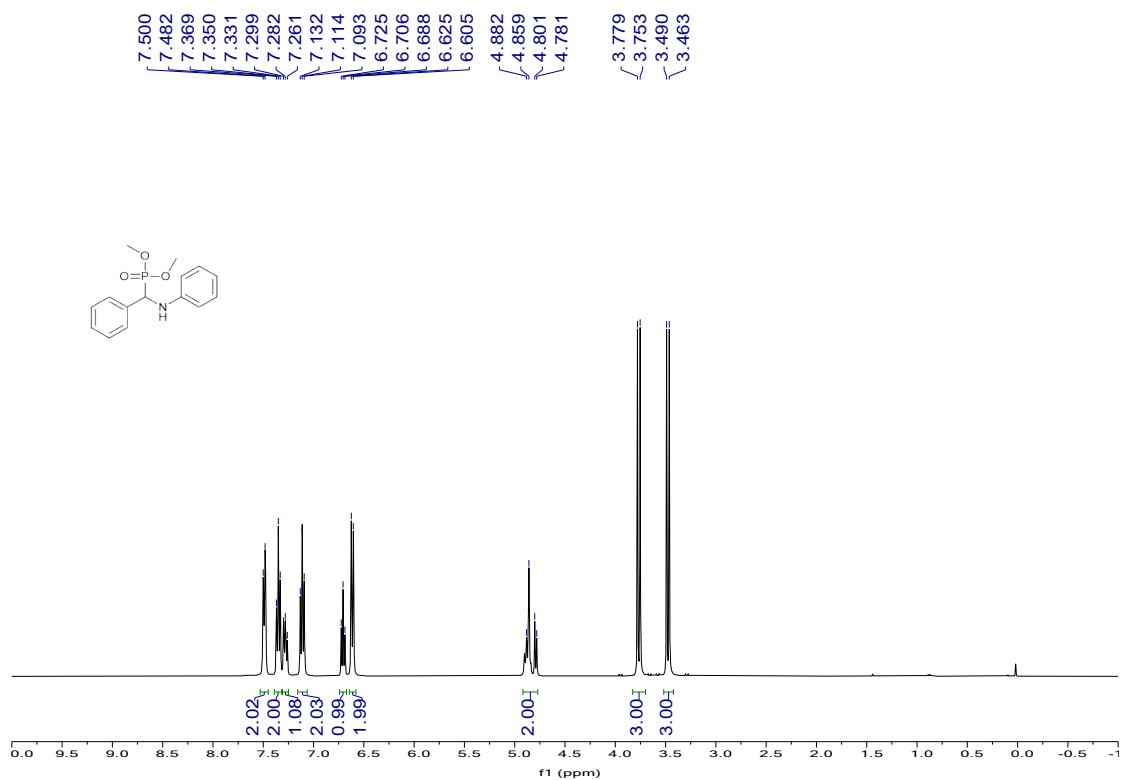

Figure S17.  $^1\text{H}$  NMR (400 MHz,  $\text{CDCl}_3$ ) spectra of **a**

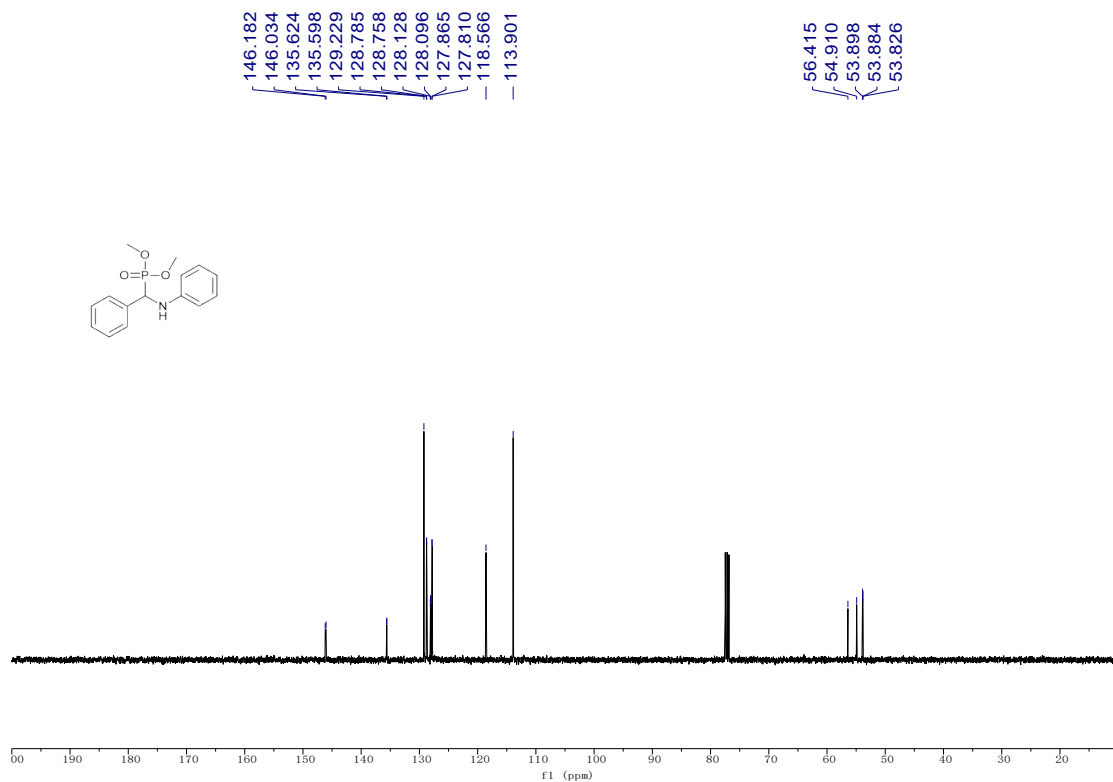

Figure S18.  $^{13}\text{C}$  NMR (101 MHz,  $\text{CDCl}_3$ ) spectra of **a**

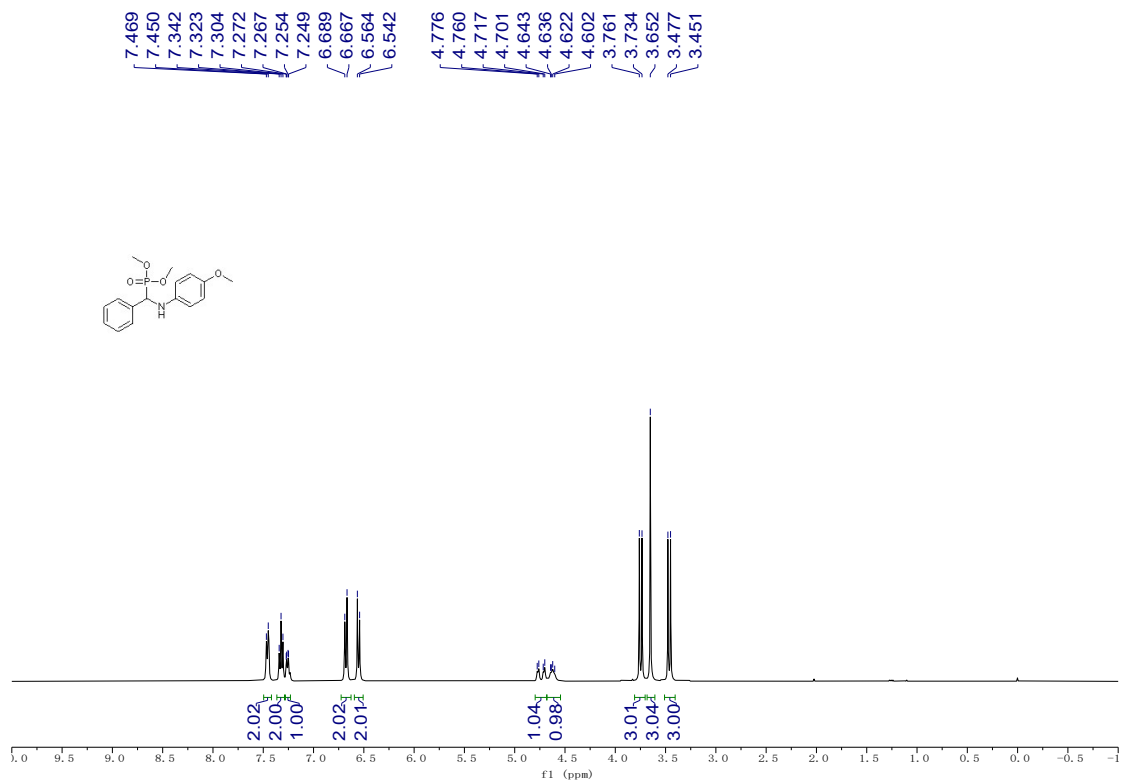

**Figure S19.**  $^1\text{H}$  NMR (400 MHz,  $\text{CDCl}_3$ ) spectra of **b**

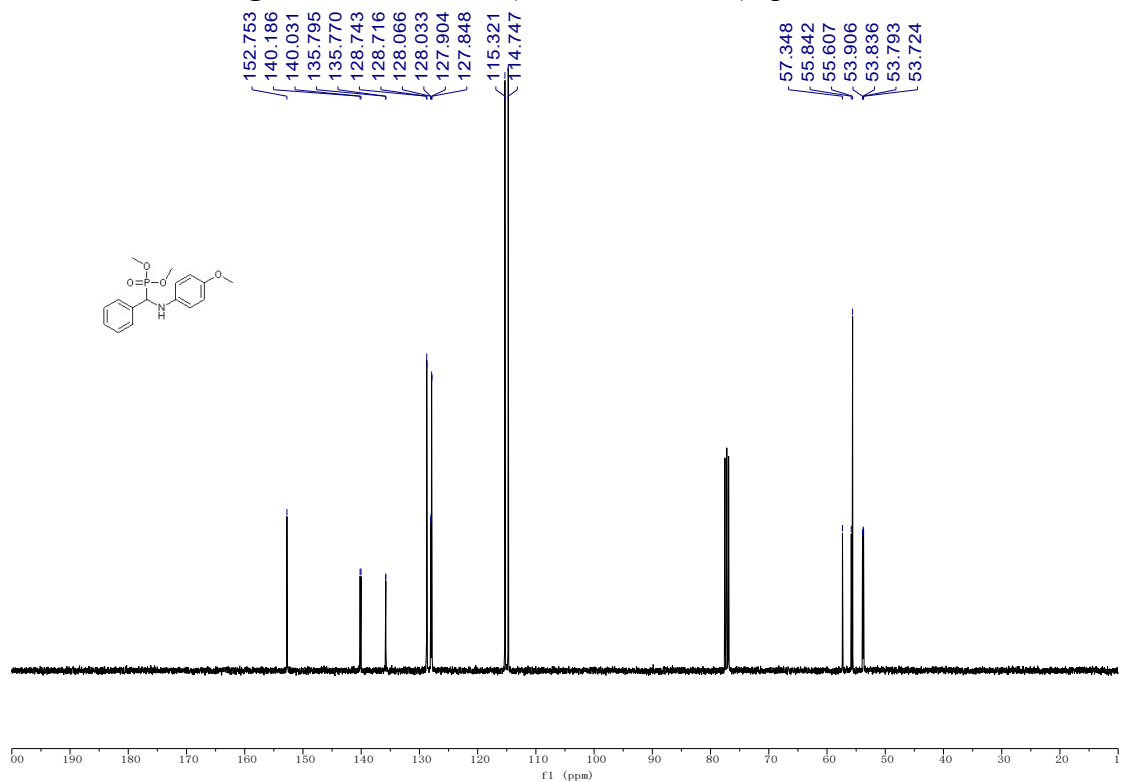

**Figure S20.**  $^{13}\text{C}$  NMR (101 MHz,  $\text{CDCl}_3$ ) spectra of **b**

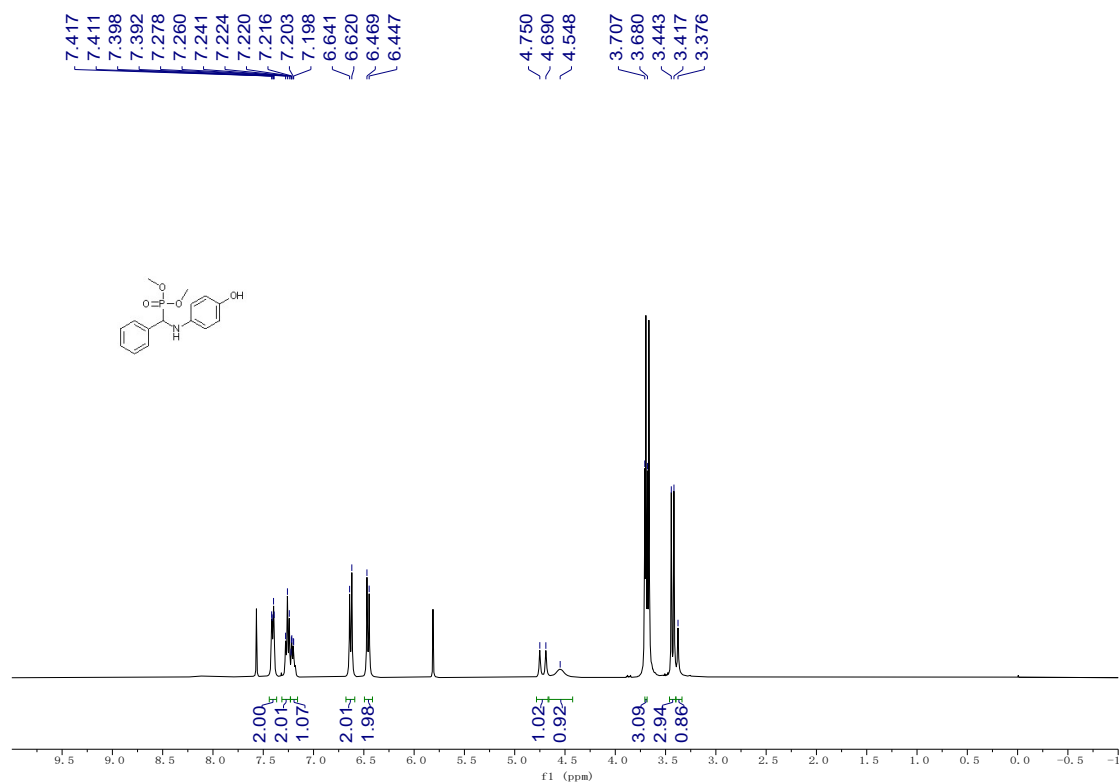

**Figure S21.** <sup>1</sup>H NMR (400 MHz, CDCl<sub>3</sub>) spectra of **c**

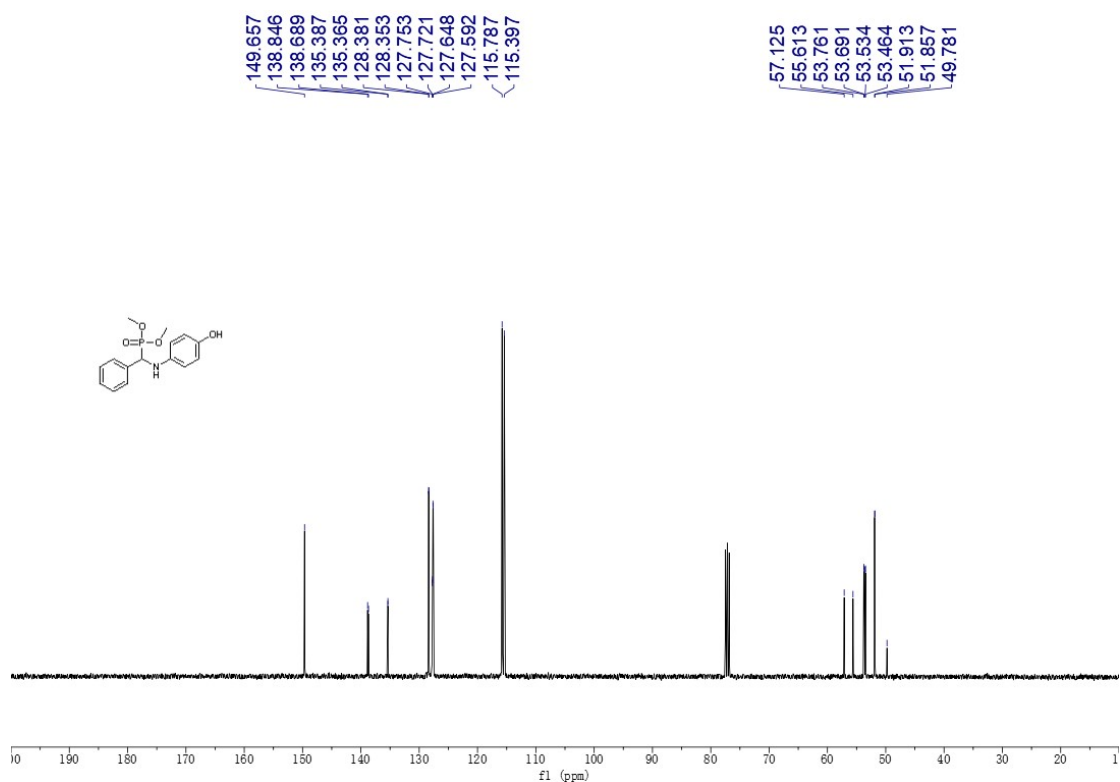

**Figure S22.** <sup>13</sup>C NMR (101 MHz, CDCl<sub>3</sub>) spectra of **c**



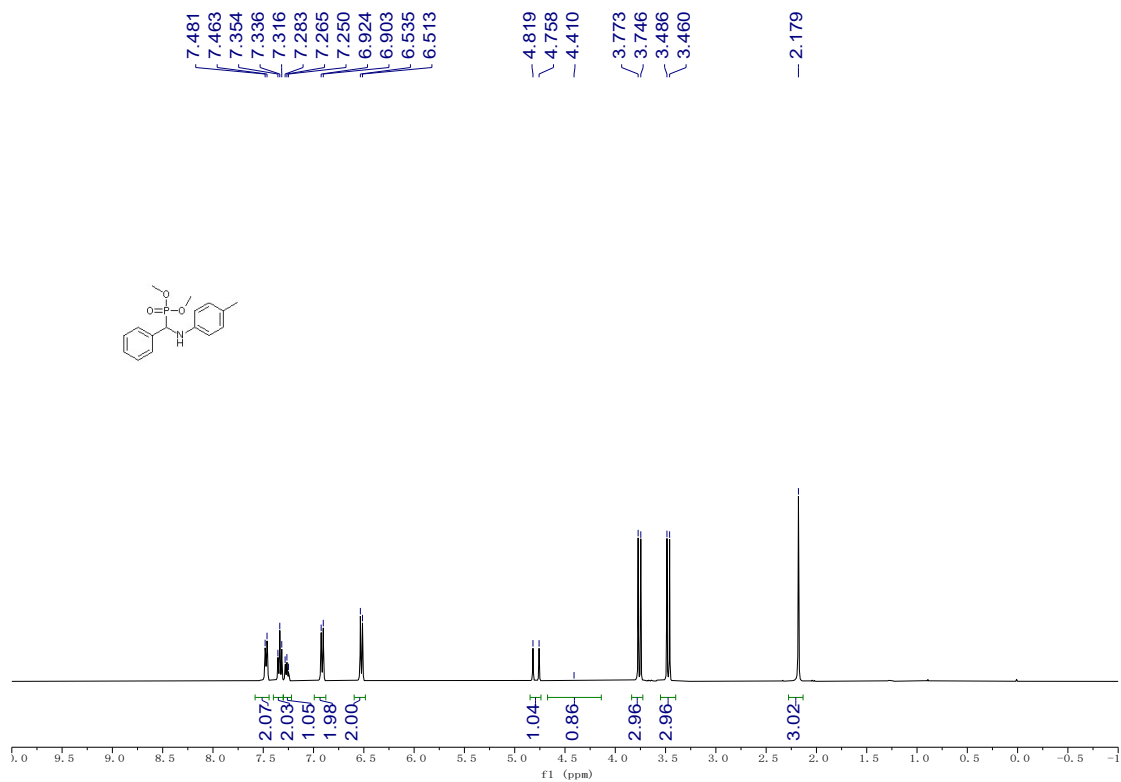

**Figure S23.** <sup>1</sup>H NMR (400 MHz, CDCl<sub>3</sub>) spectra of **d**

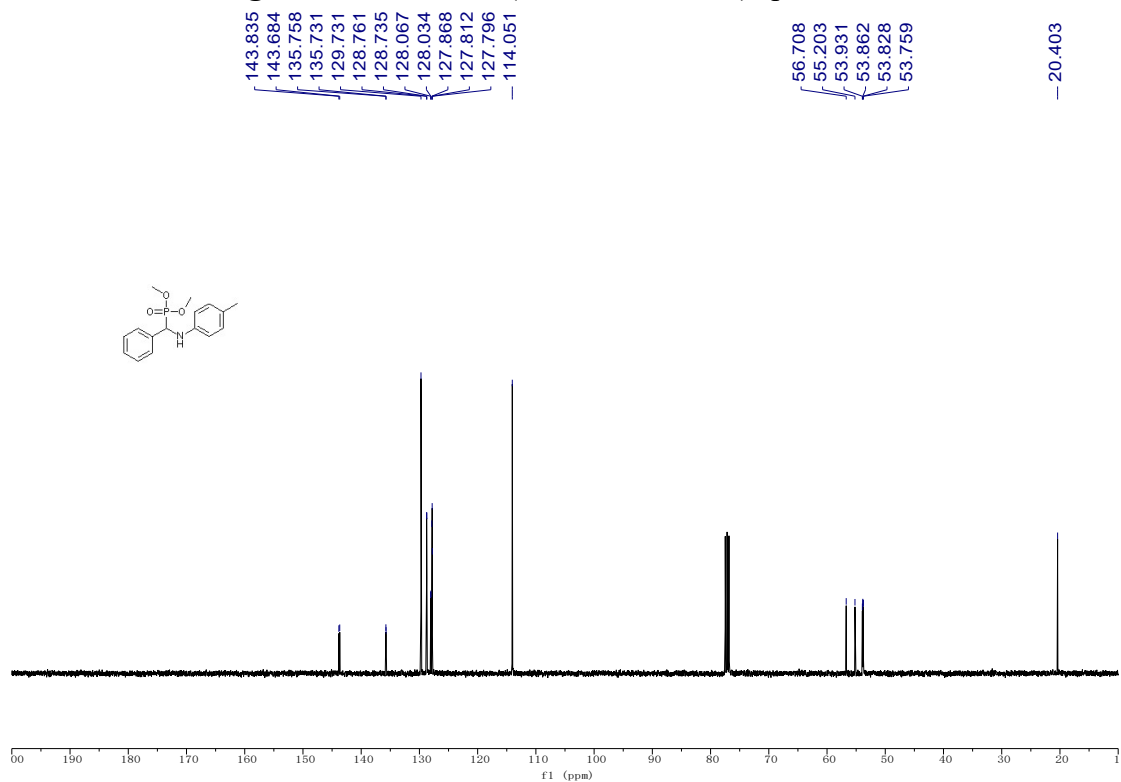

**Figure S24.** <sup>13</sup>C NMR (101 MHz, CDCl<sub>3</sub>) spectra of **d**

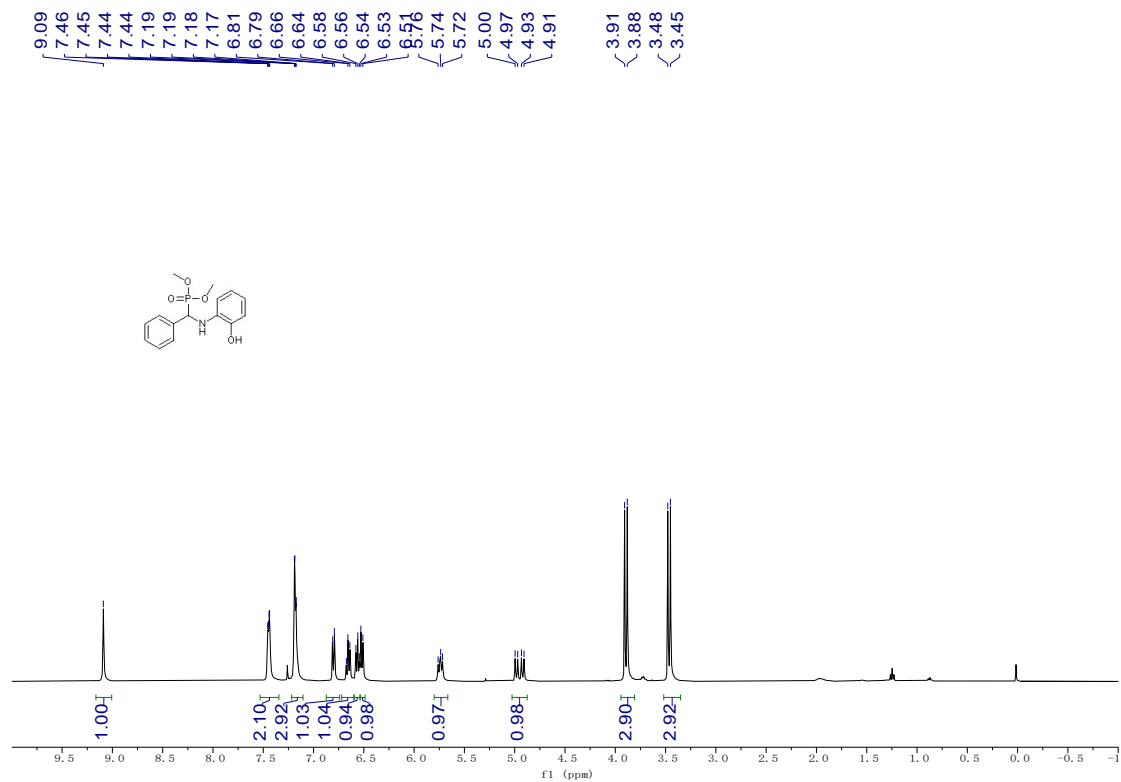

Figure S25. <sup>1</sup>H NMR (400 MHz, CDCl<sub>3</sub>) spectra of e

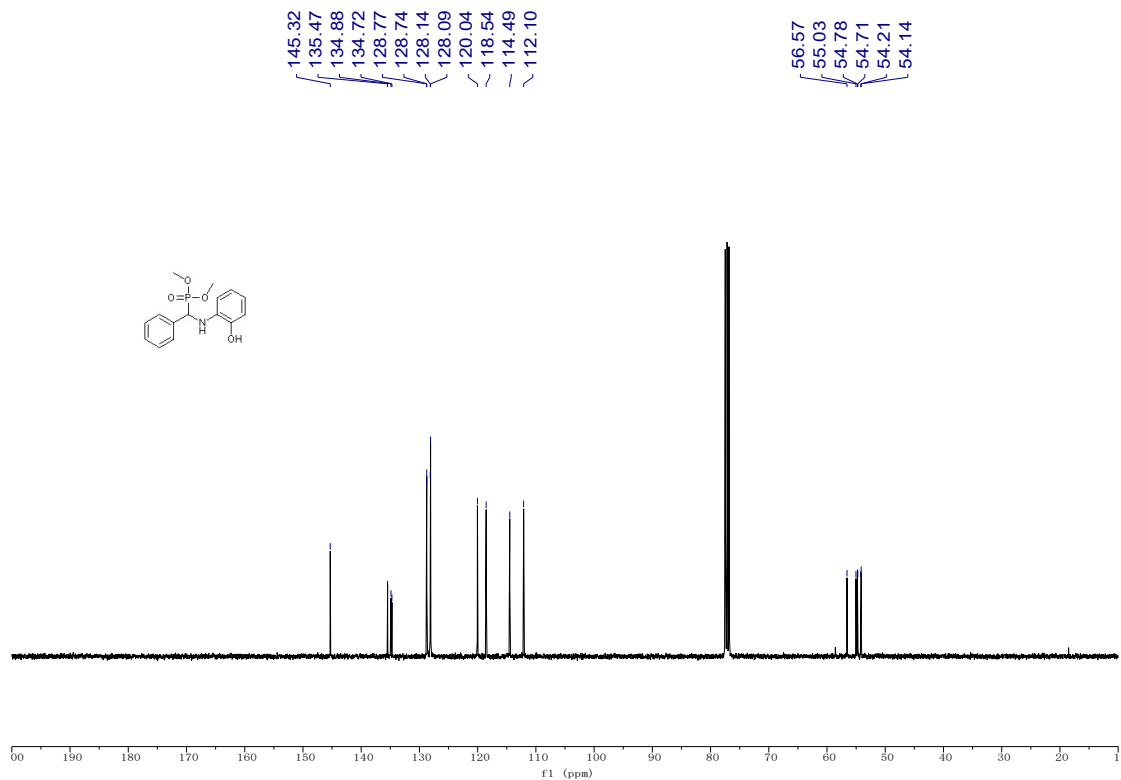

Figure S26. <sup>13</sup>C NMR (101 MHz, CDCl<sub>3</sub>) spectra of e

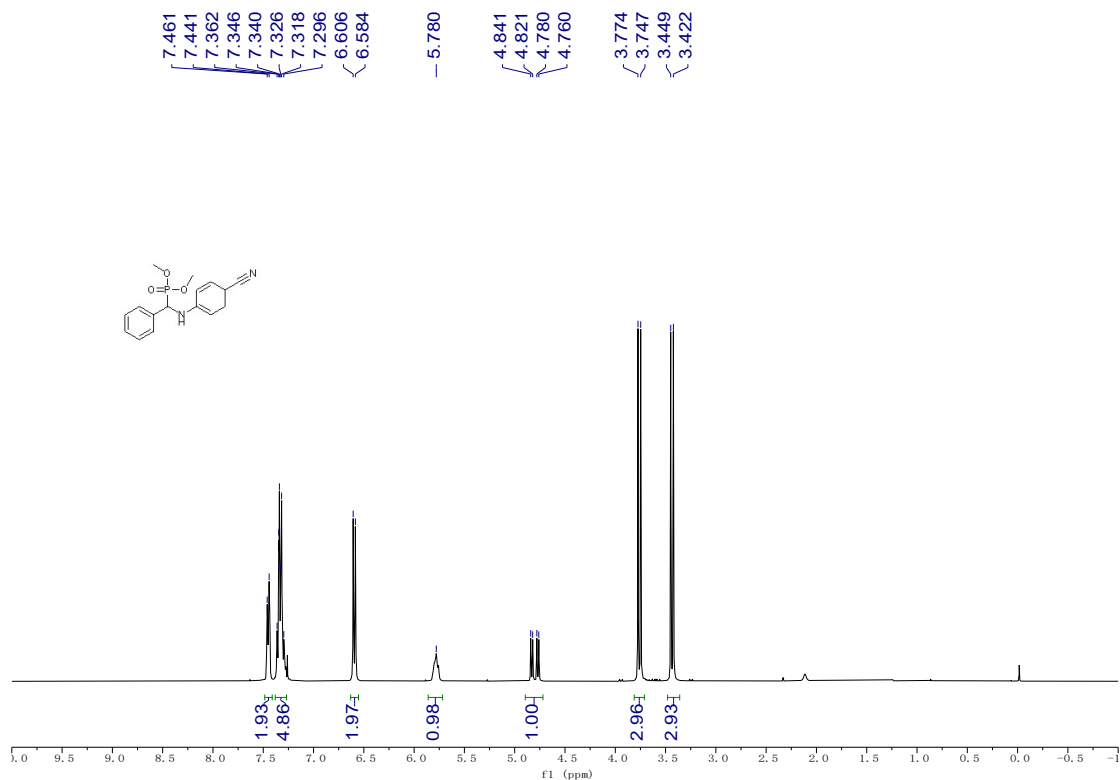

**Figure S27.** <sup>1</sup>H NMR (400 MHz, CDCl<sub>3</sub>) spectra of **f**

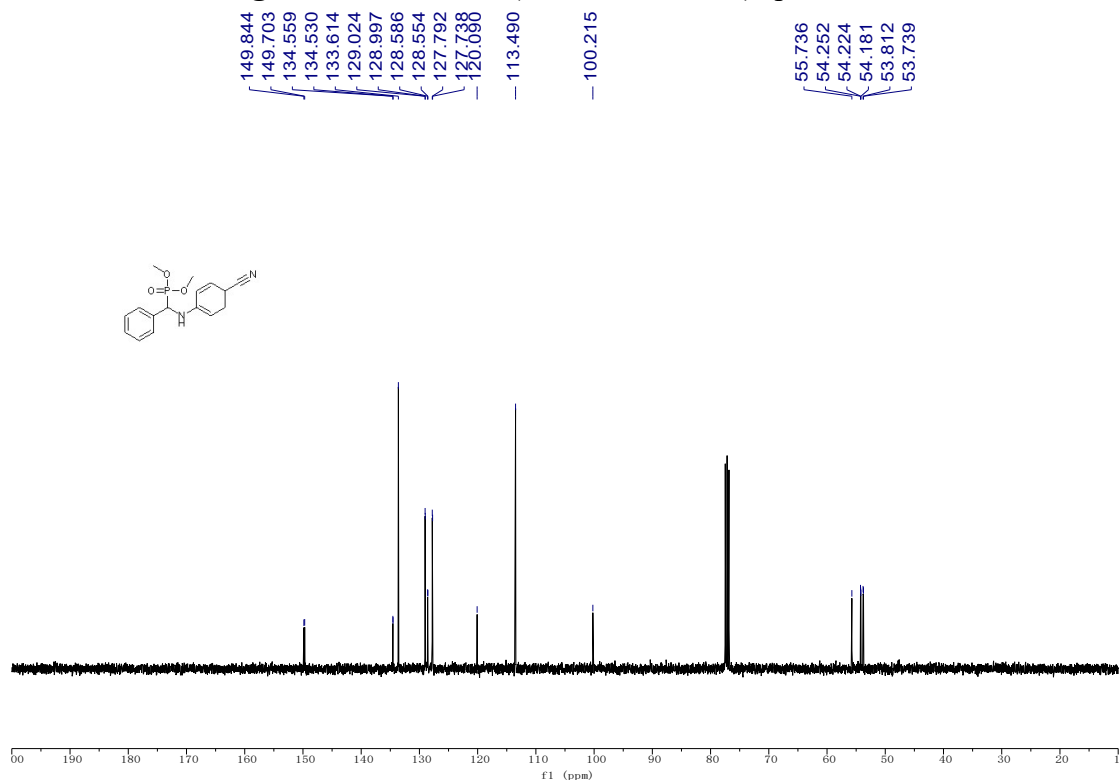

**Figure S28.** <sup>13</sup>C NMR (101 MHz, CDCl<sub>3</sub>) spectra of **f**

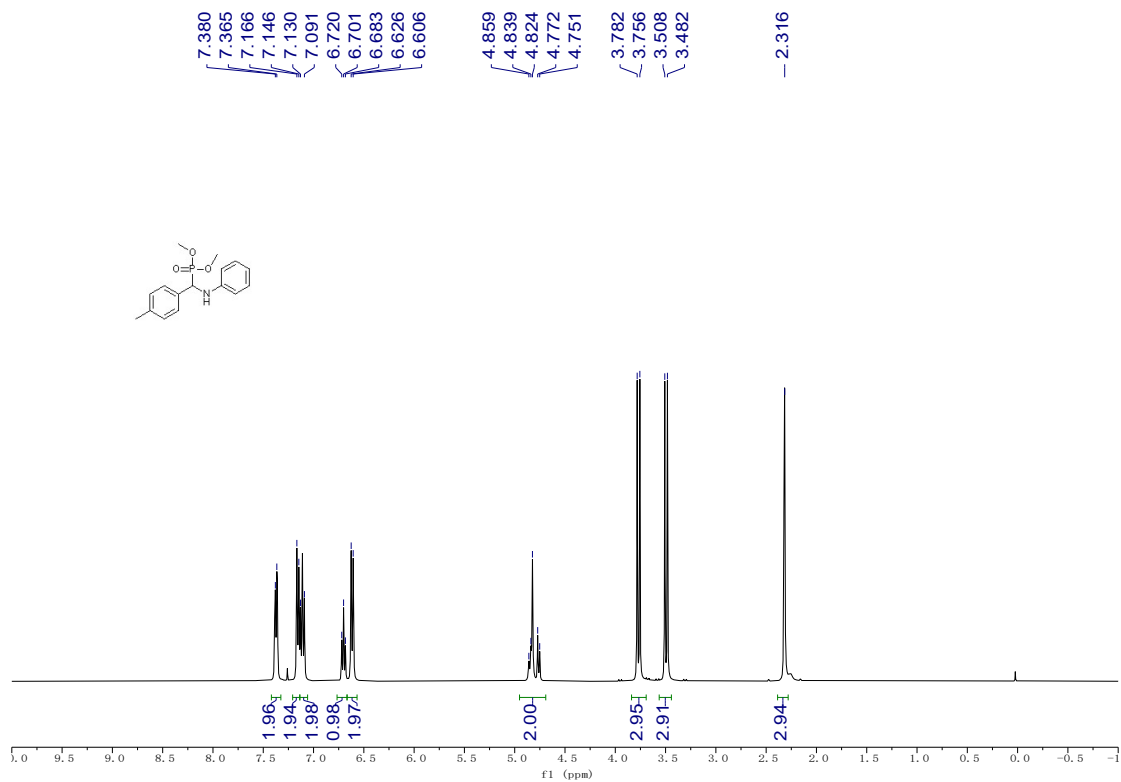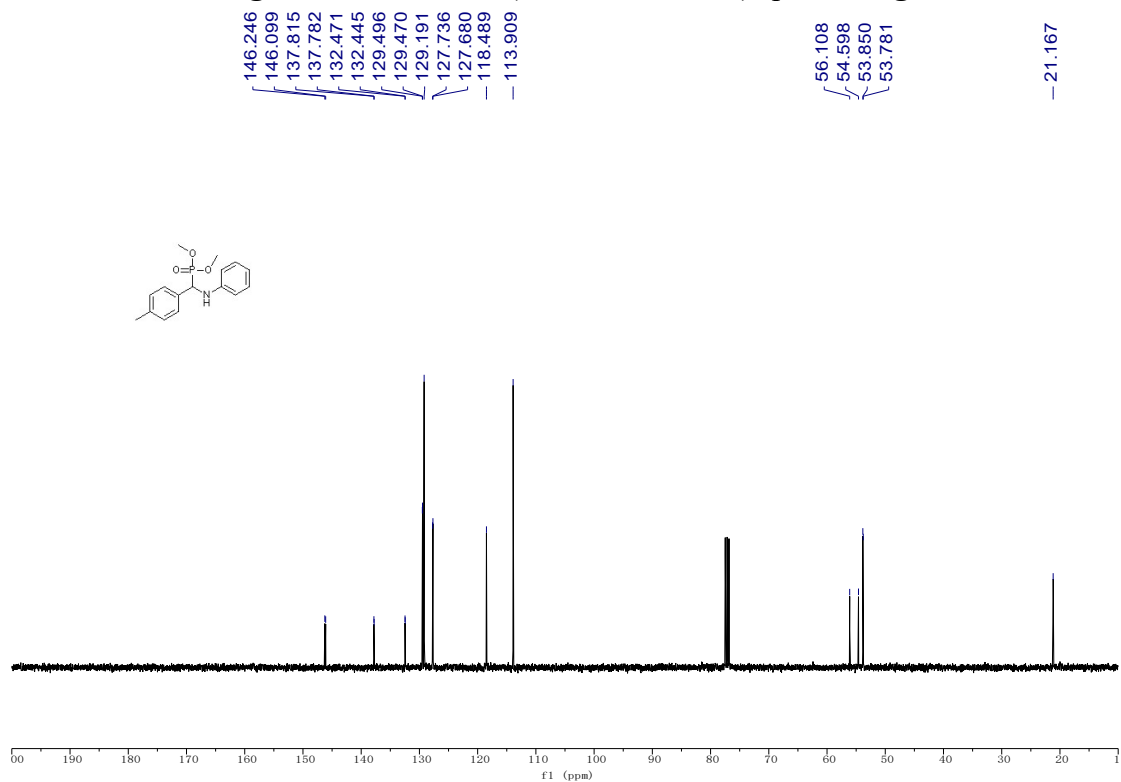

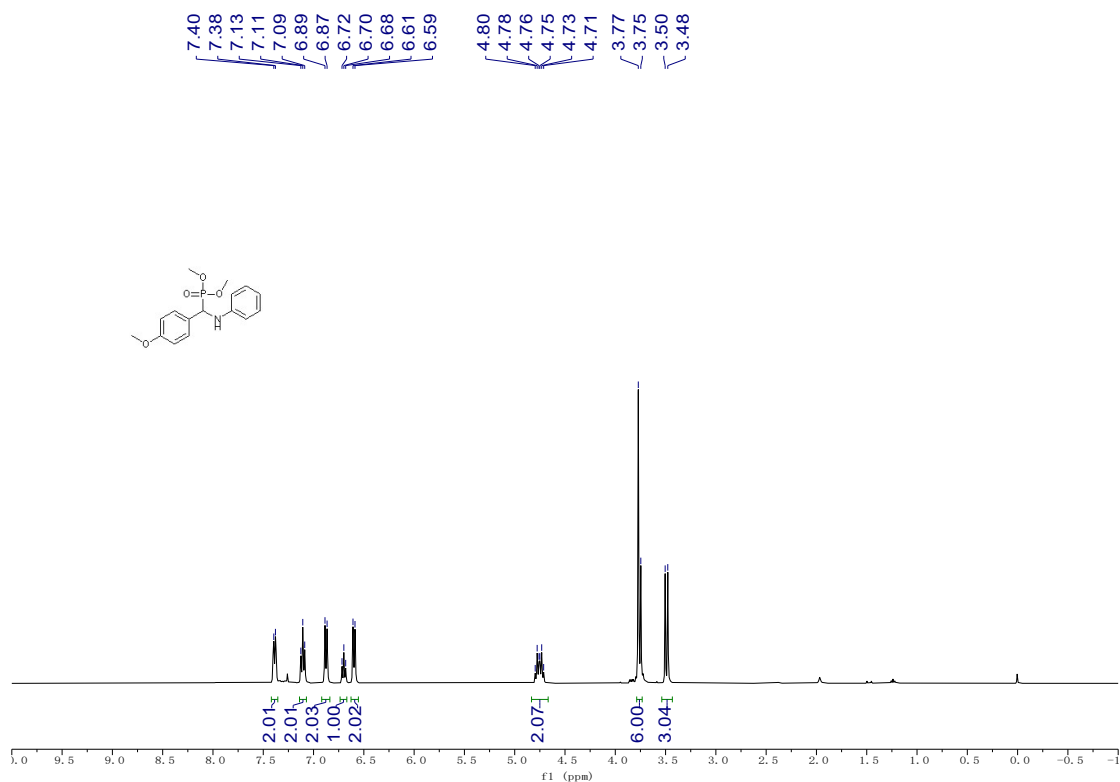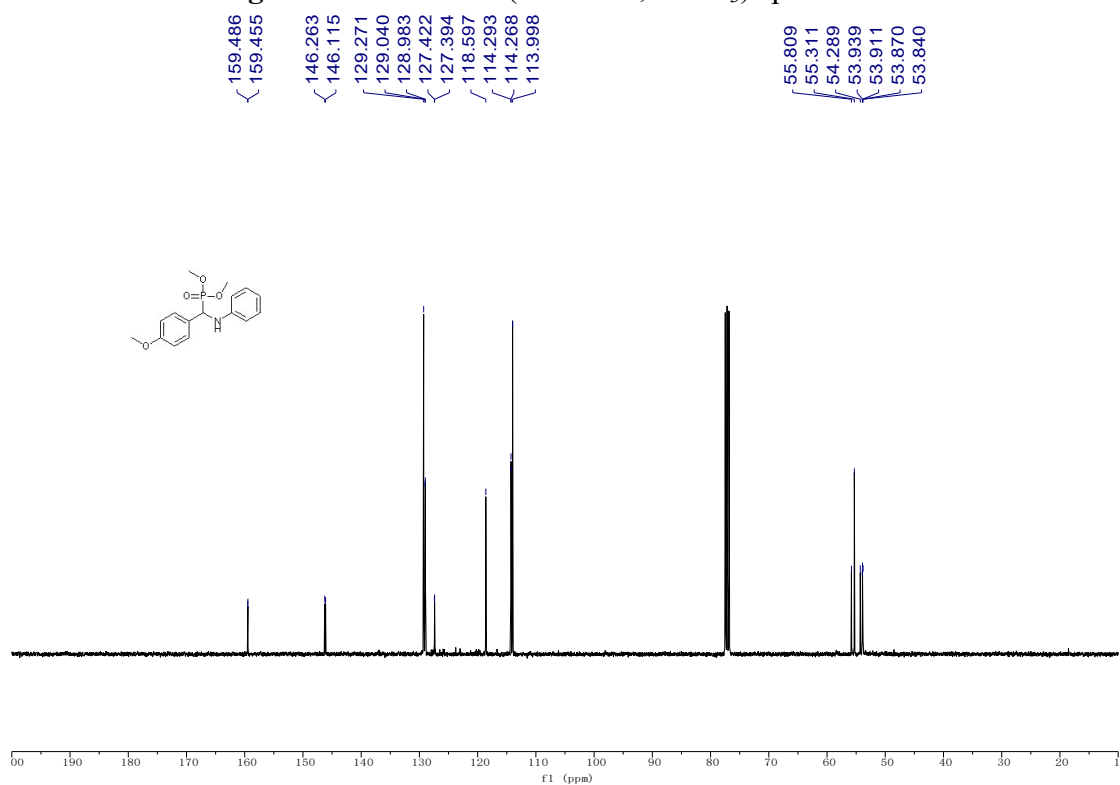

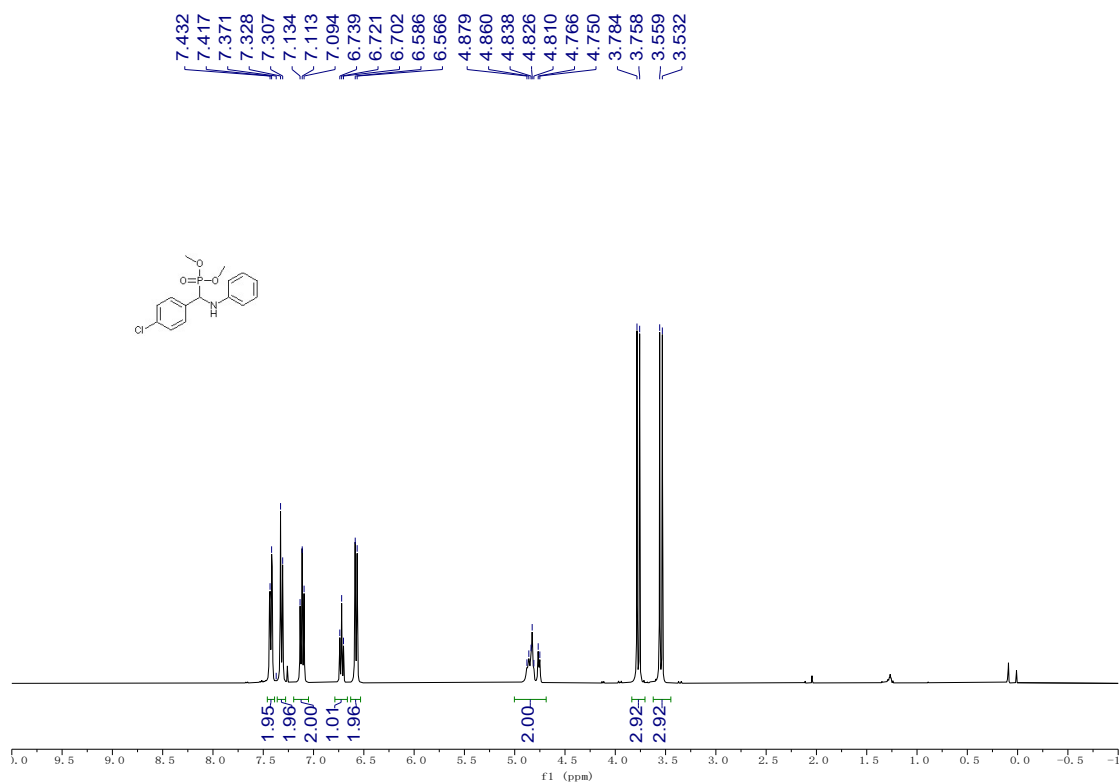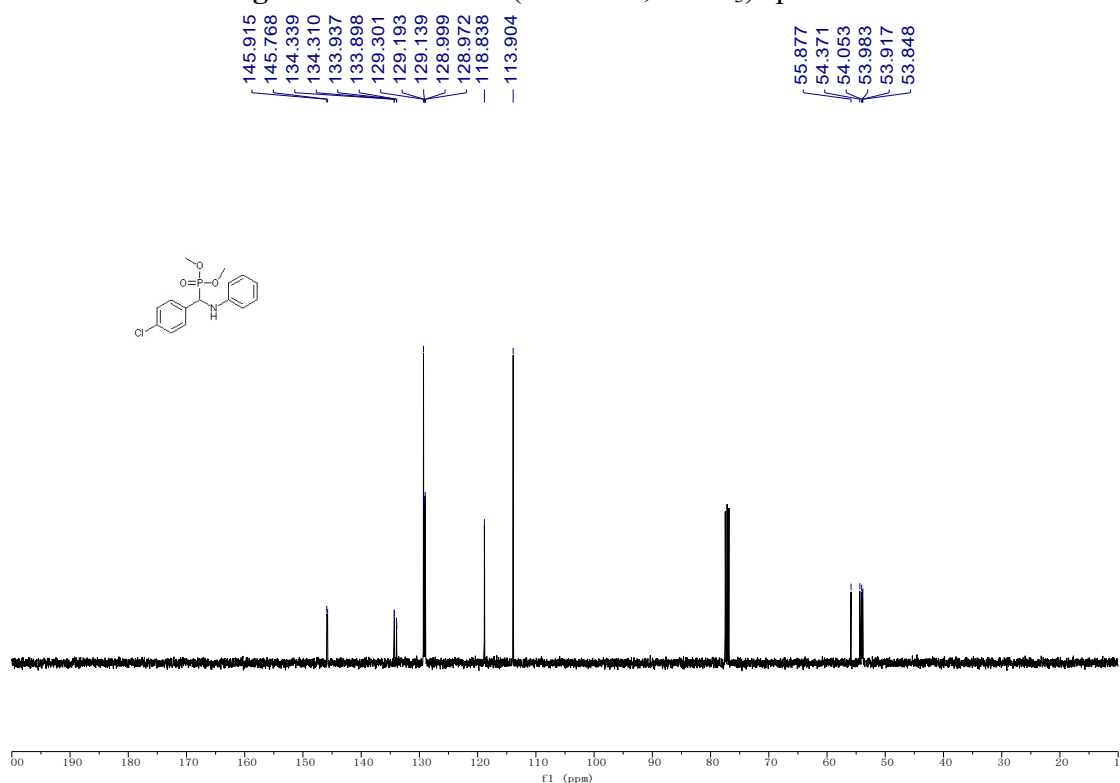

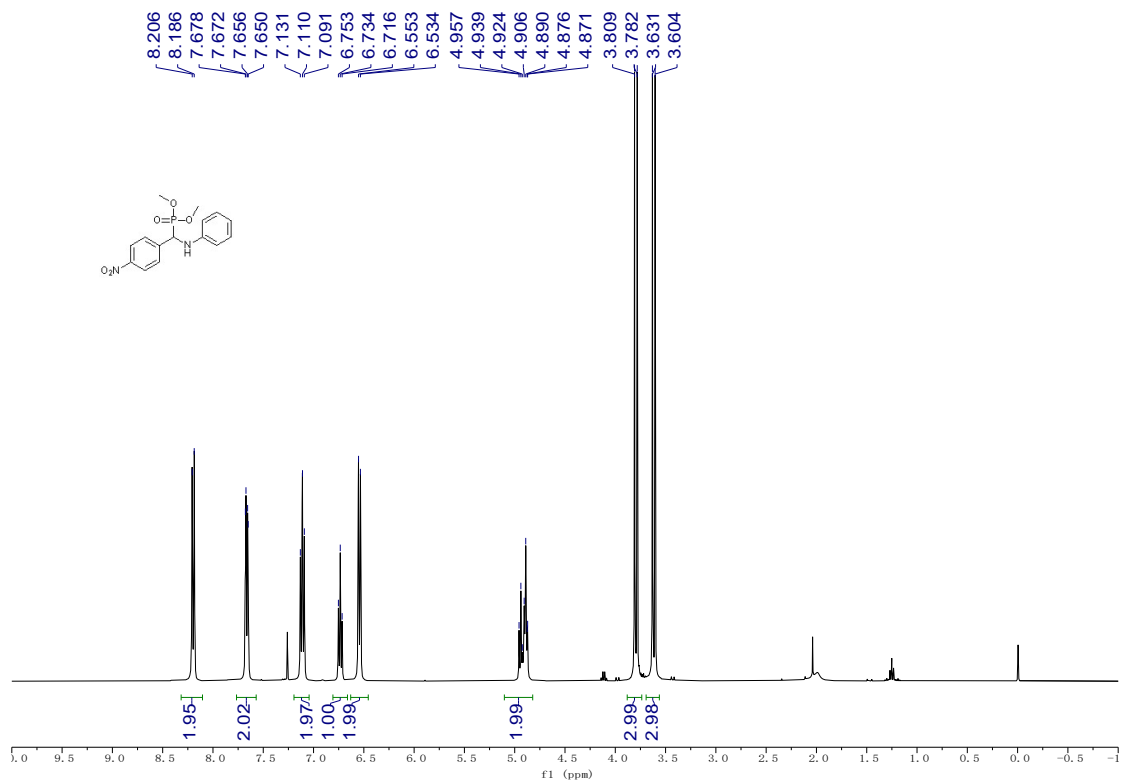

**Figure S35.** <sup>1</sup>H NMR (400 MHz, CDCl<sub>3</sub>) spectra of **j**

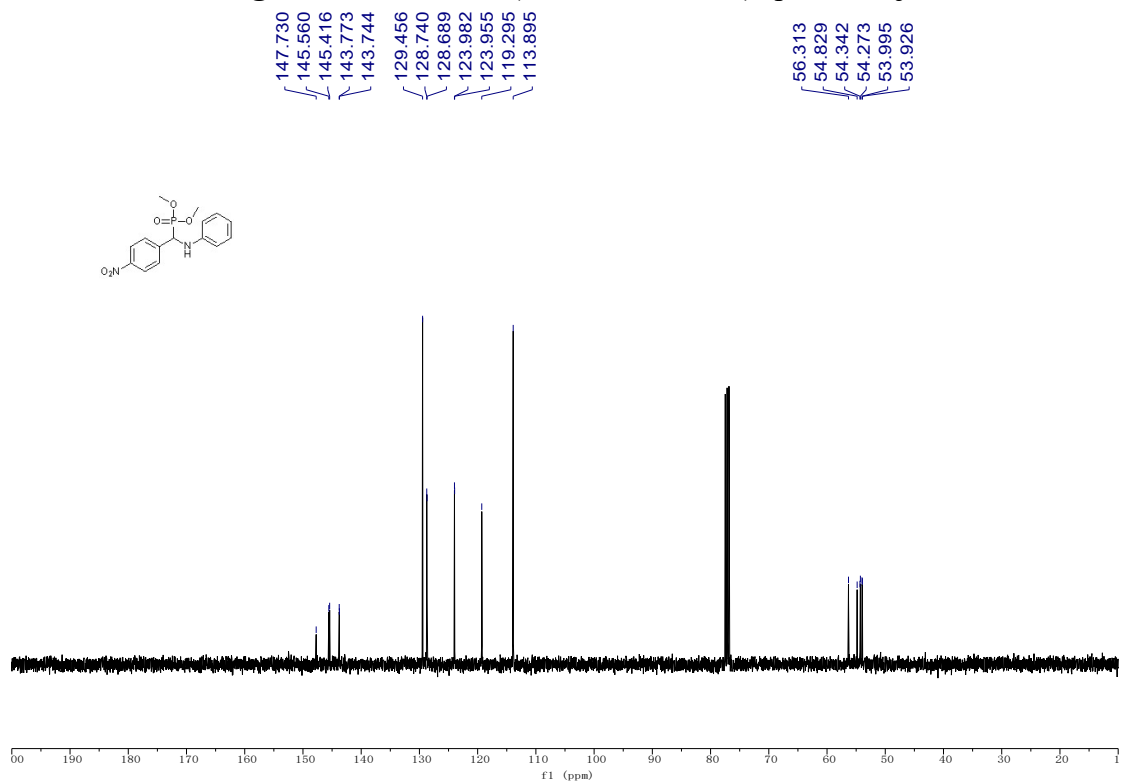

**Figure S36.** <sup>13</sup>C NMR (101 MHz, CDCl<sub>3</sub>) spectra of **j**

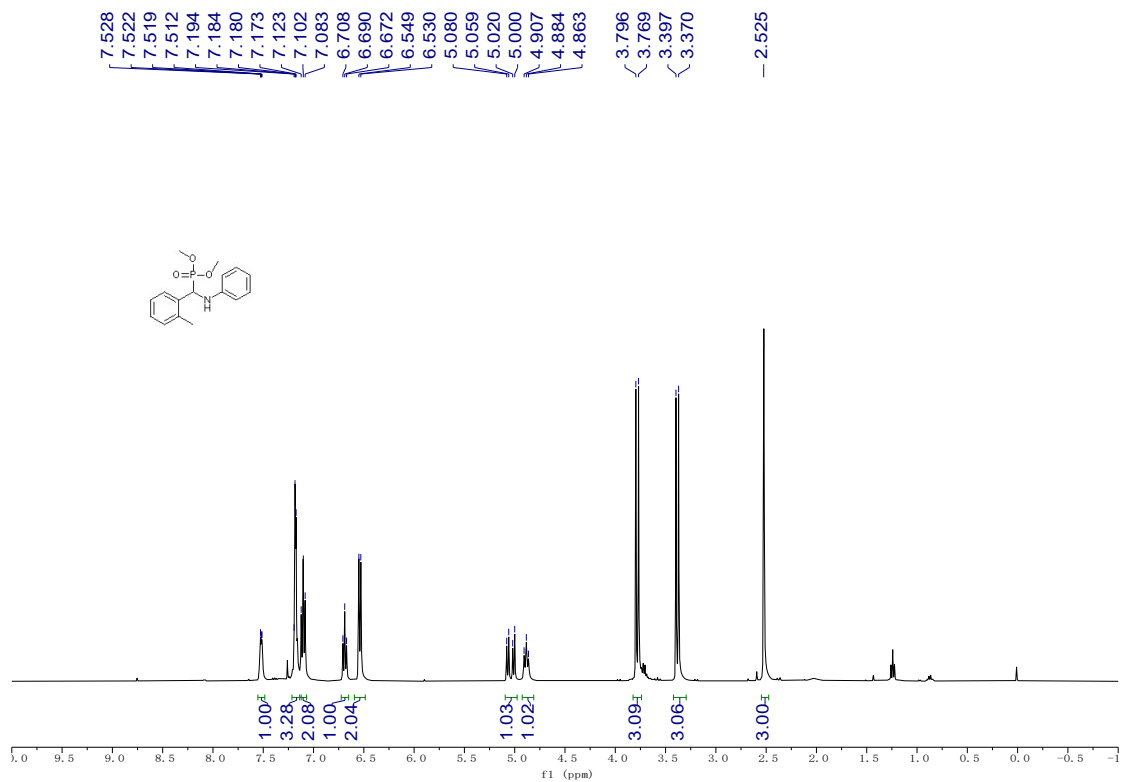

**Figure S37.** <sup>1</sup>H NMR (400 MHz, CDCl<sub>3</sub>) spectra of **k**

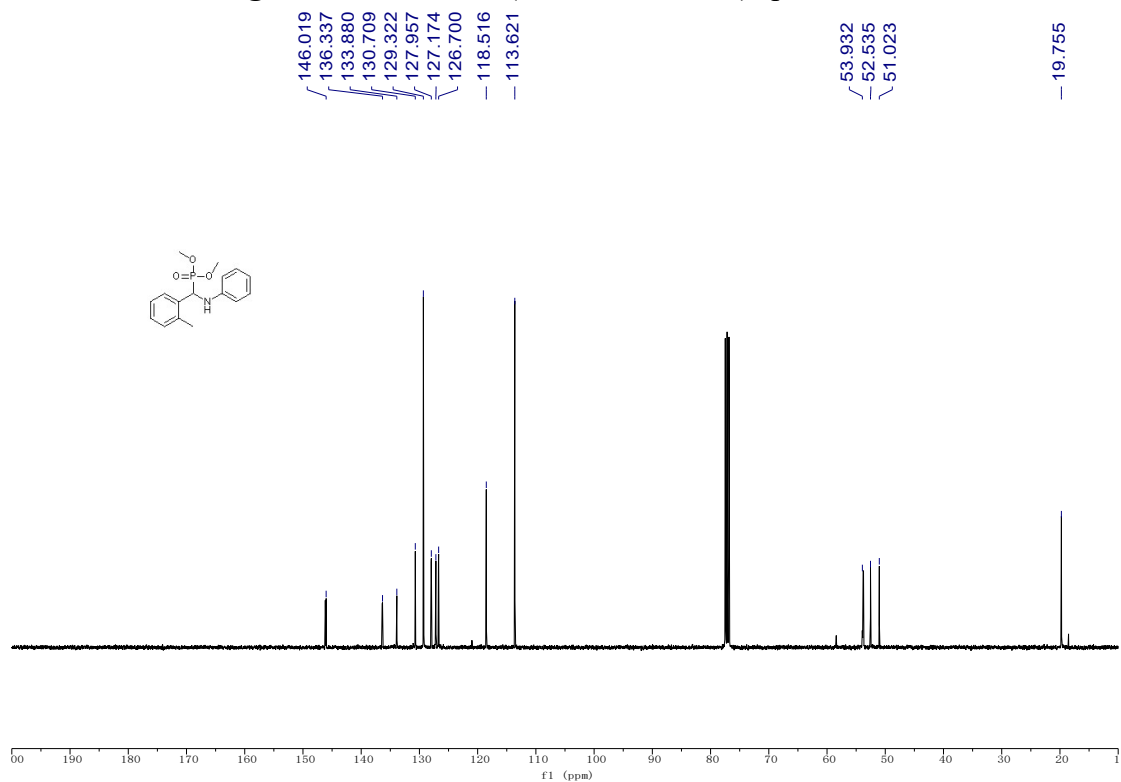

**Figure S38.** <sup>13</sup>C NMR (101 MHz, CDCl<sub>3</sub>) spectra of **k**



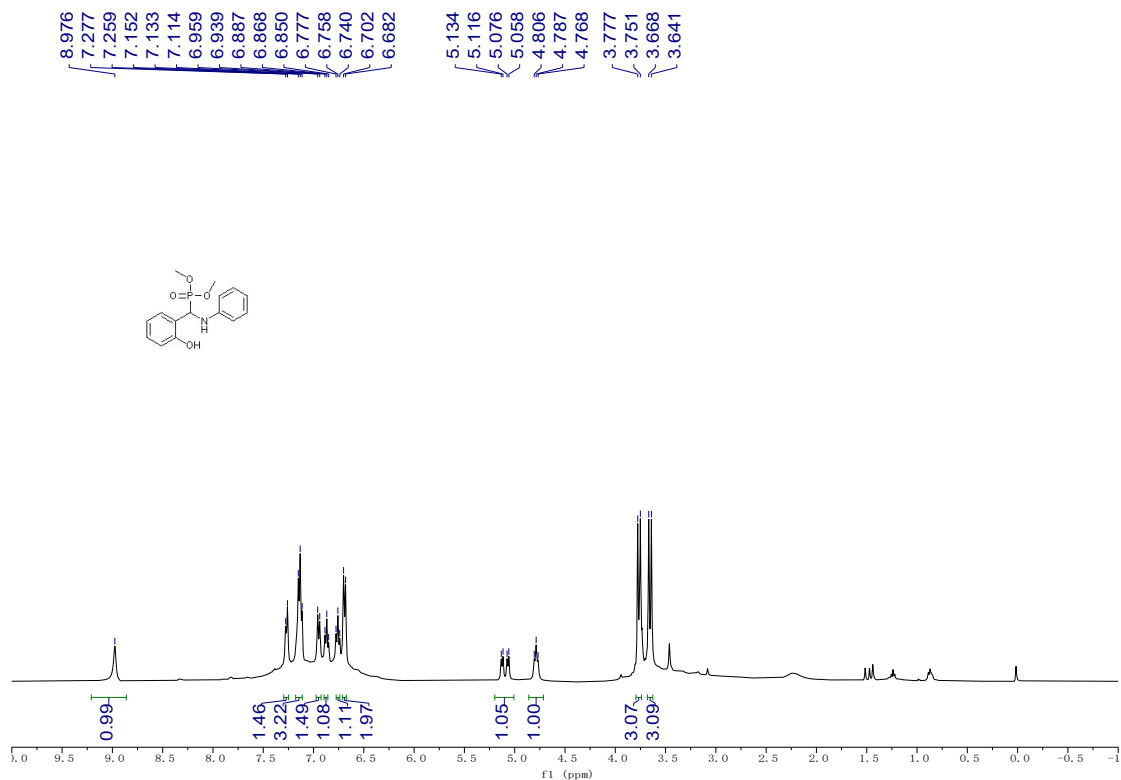

Figure S39. <sup>1</sup>H NMR (400 MHz, CDCl<sub>3</sub>) spectra of **1**

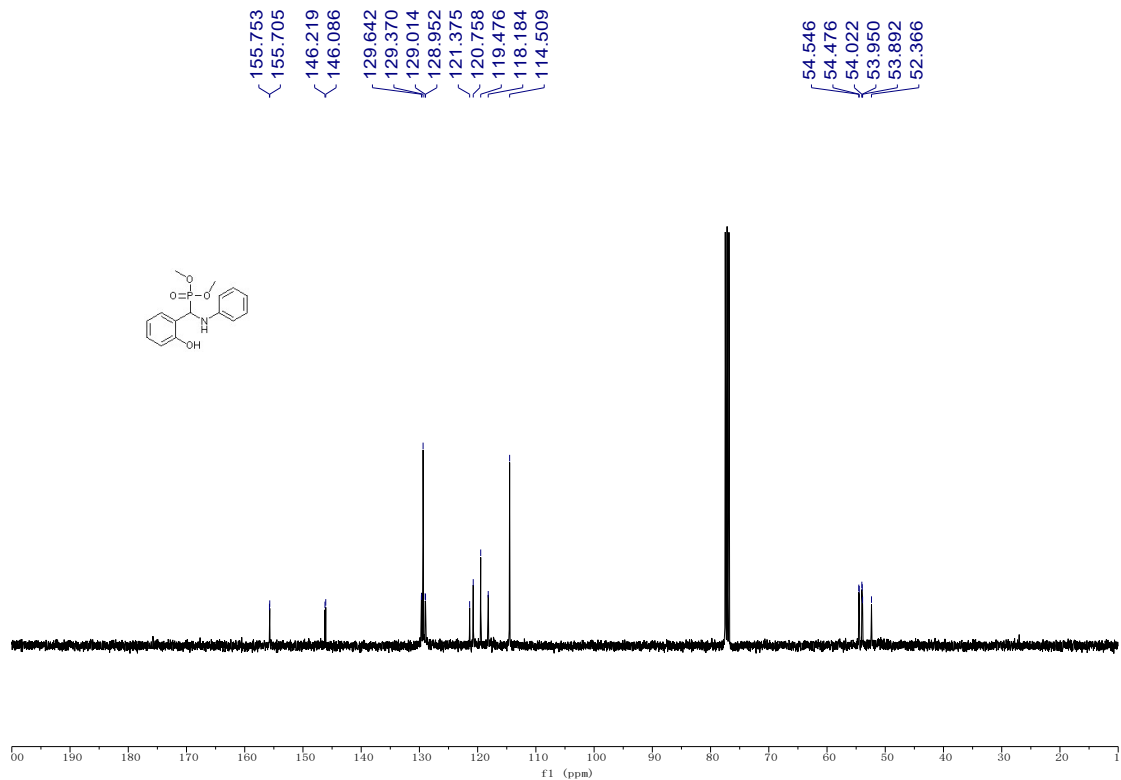

Figure S40. <sup>13</sup>C NMR (101 MHz, CDCl<sub>3</sub>) spectra of **1**

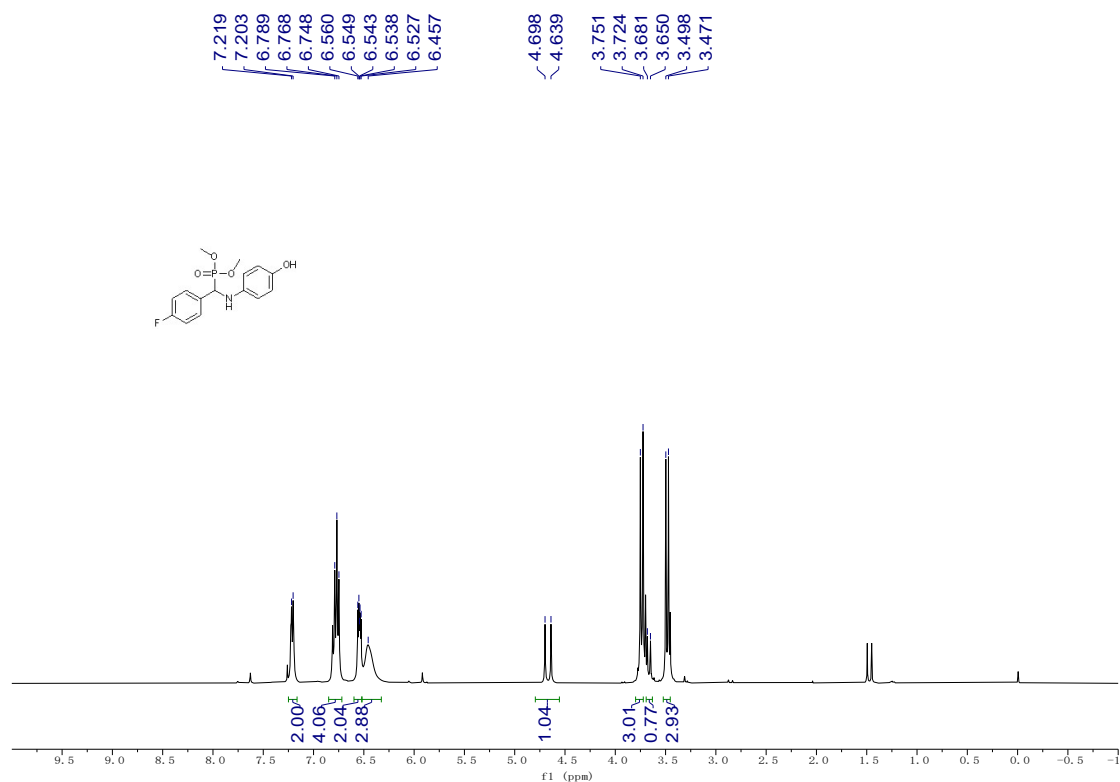

**Figure S41.** <sup>1</sup>H NMR (400 MHz, CDCl<sub>3</sub>) spectra of **m**

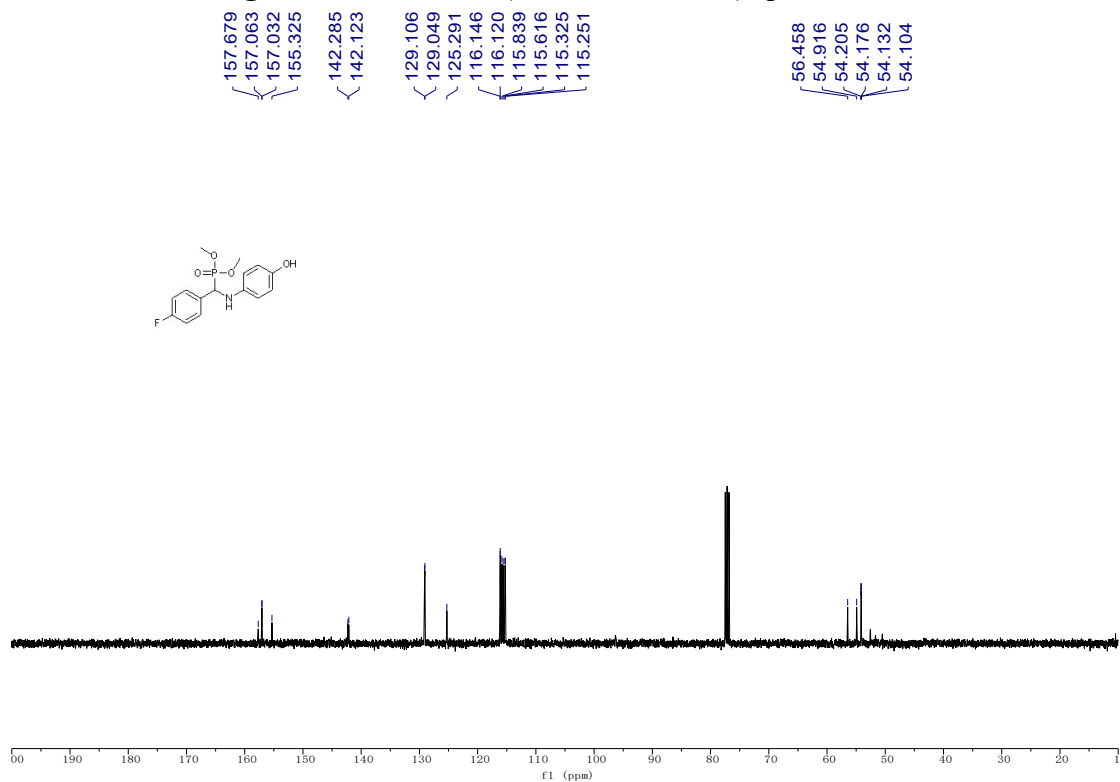

**Figure S42.** <sup>13</sup>C NMR (101 MHz, CDCl<sub>3</sub>) spectra of **m**

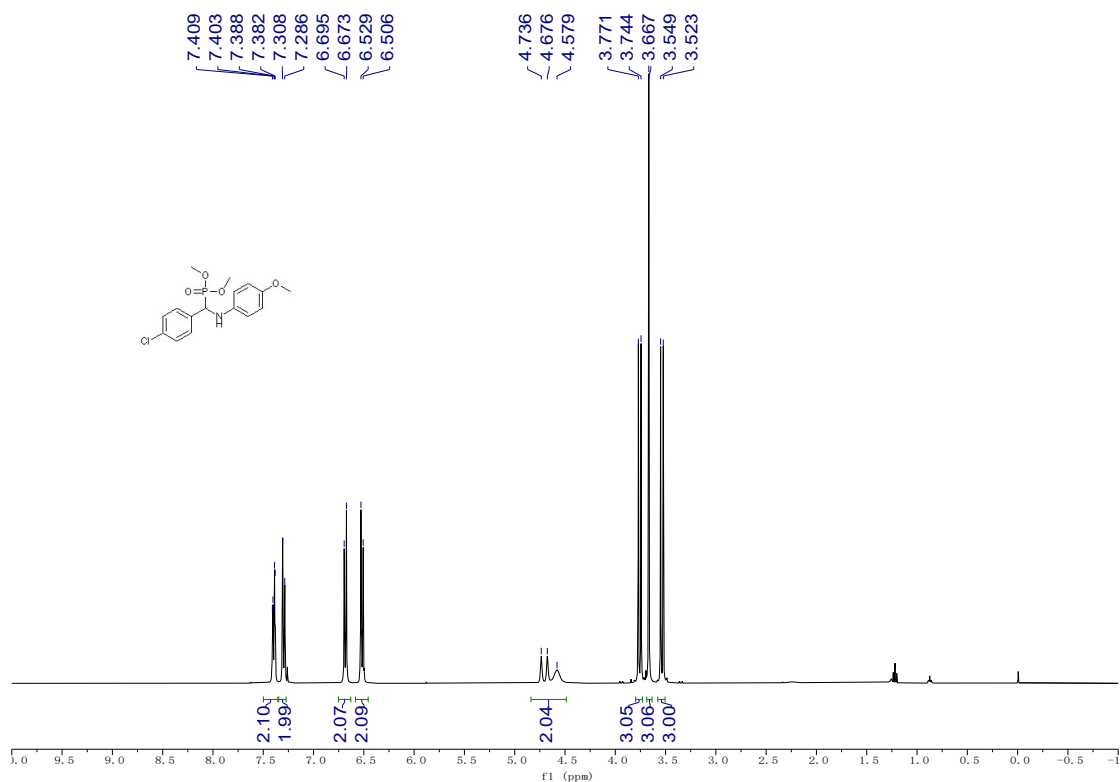

**Figure S43.**  $^1\text{H}$  NMR (400 MHz,  $\text{CDCl}_3$ ) spectra of **n**

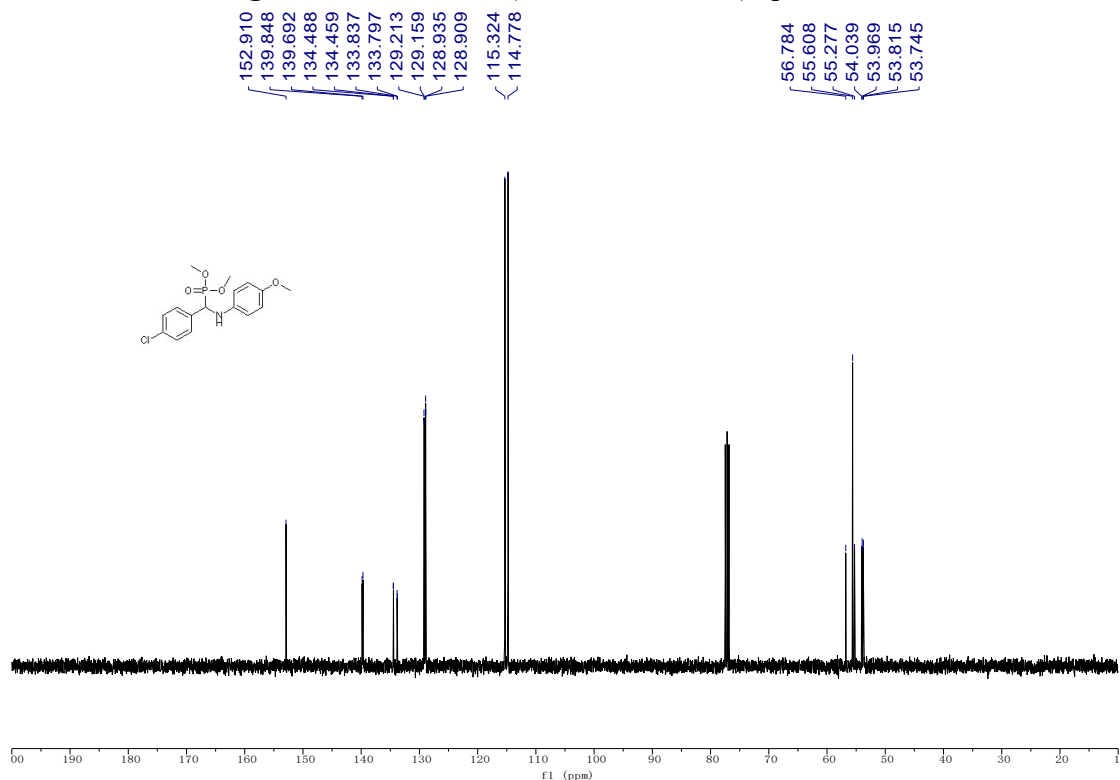

**Figure S44.**  $^{13}\text{C}$  NMR (101 MHz,  $\text{CDCl}_3$ ) spectra of **n**

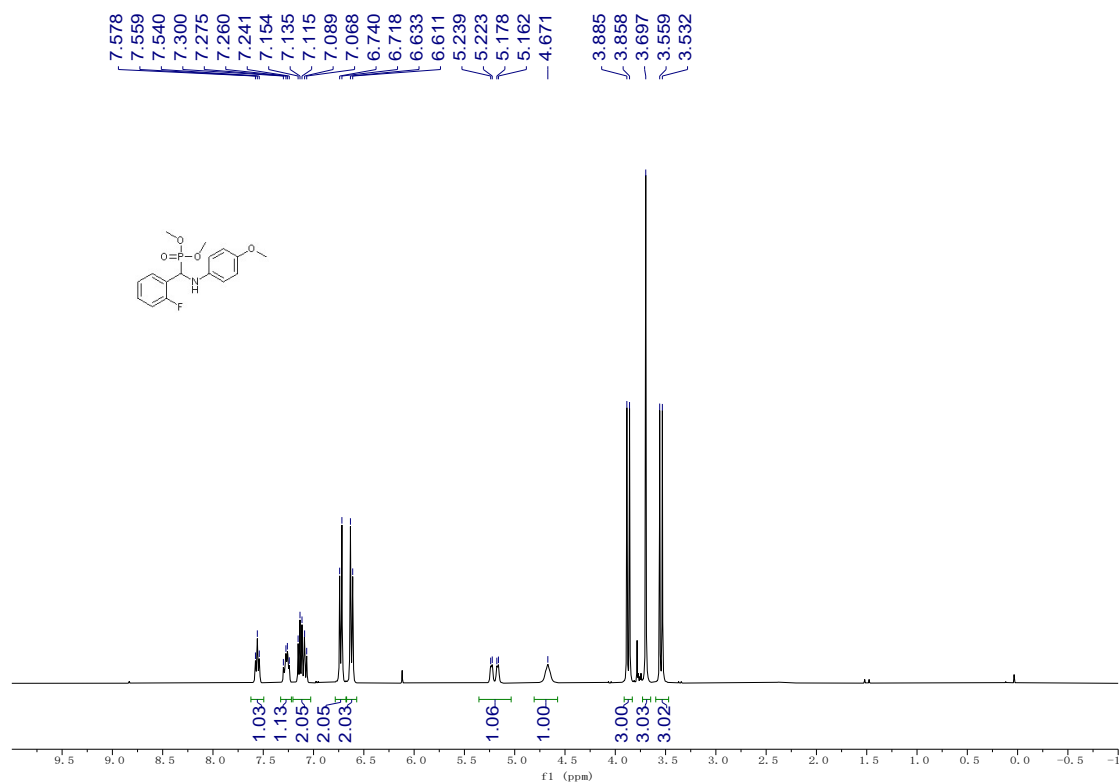

**Figure S45.** <sup>1</sup>H NMR (400 MHz, CDCl<sub>3</sub>) spectra of **o**

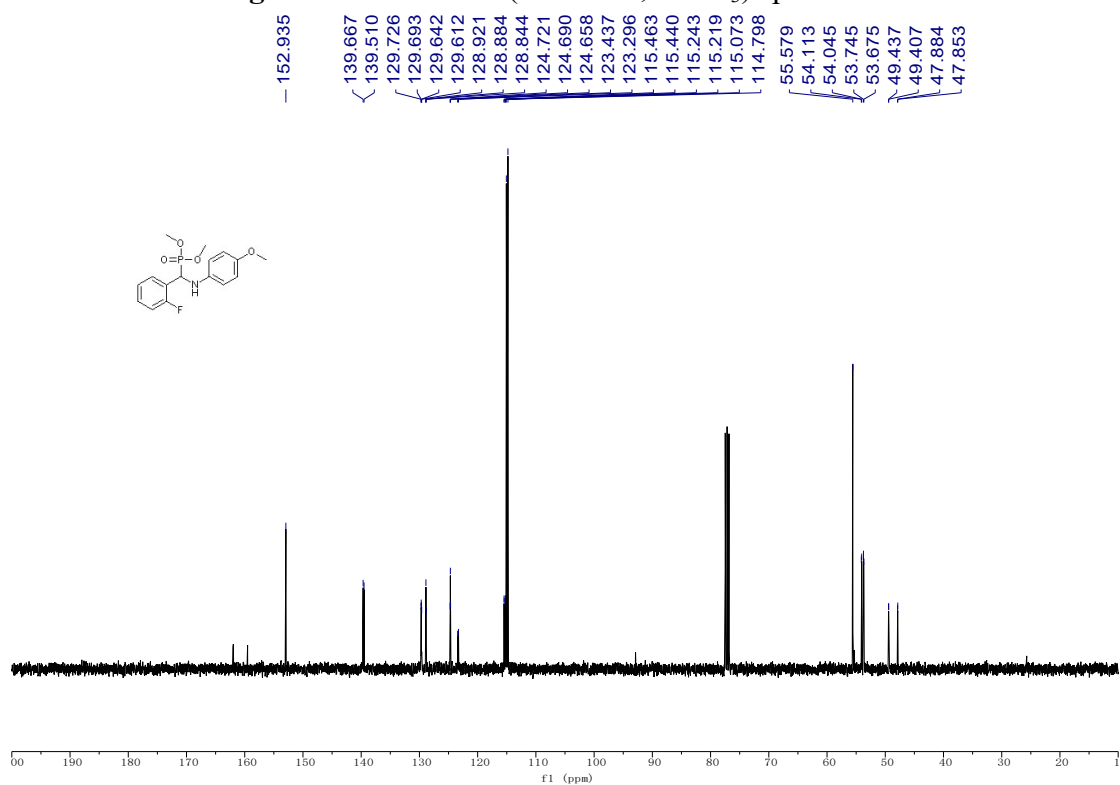

**Figure S46.** <sup>13</sup>C NMR (101 MHz, CDCl<sub>3</sub>) spectra of **n**

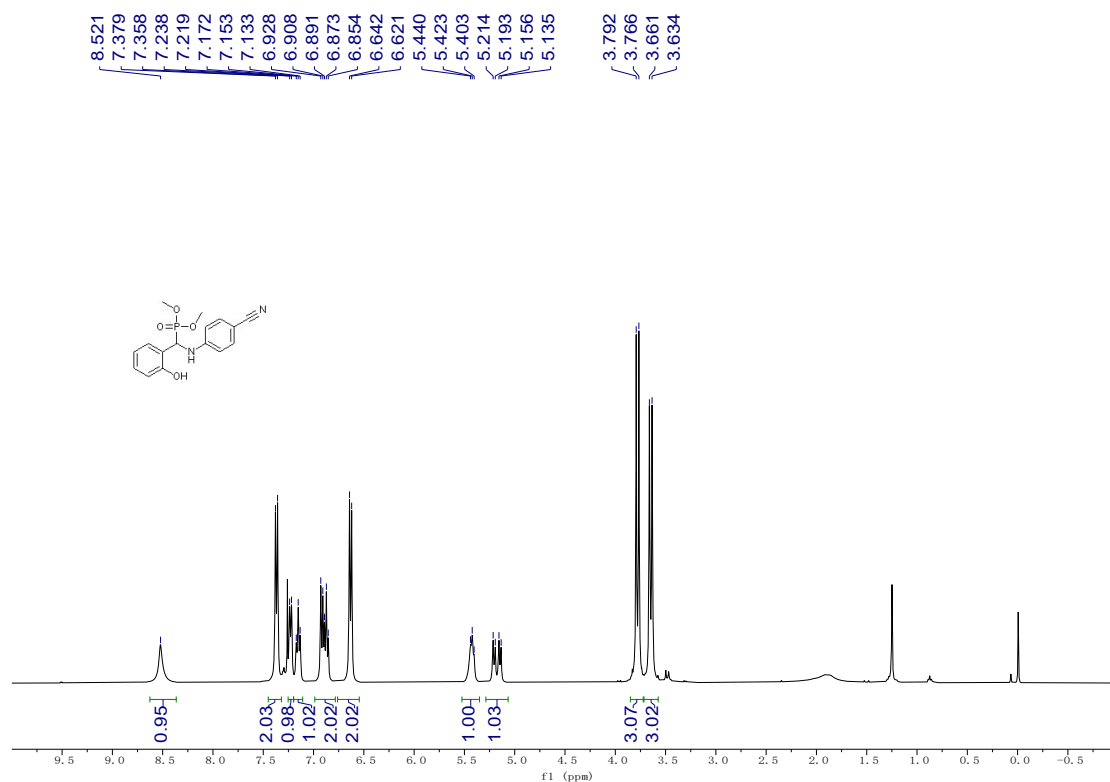

**Figure S47.** <sup>1</sup>H NMR (400 MHz, CDCl<sub>3</sub>) spectra of **p**

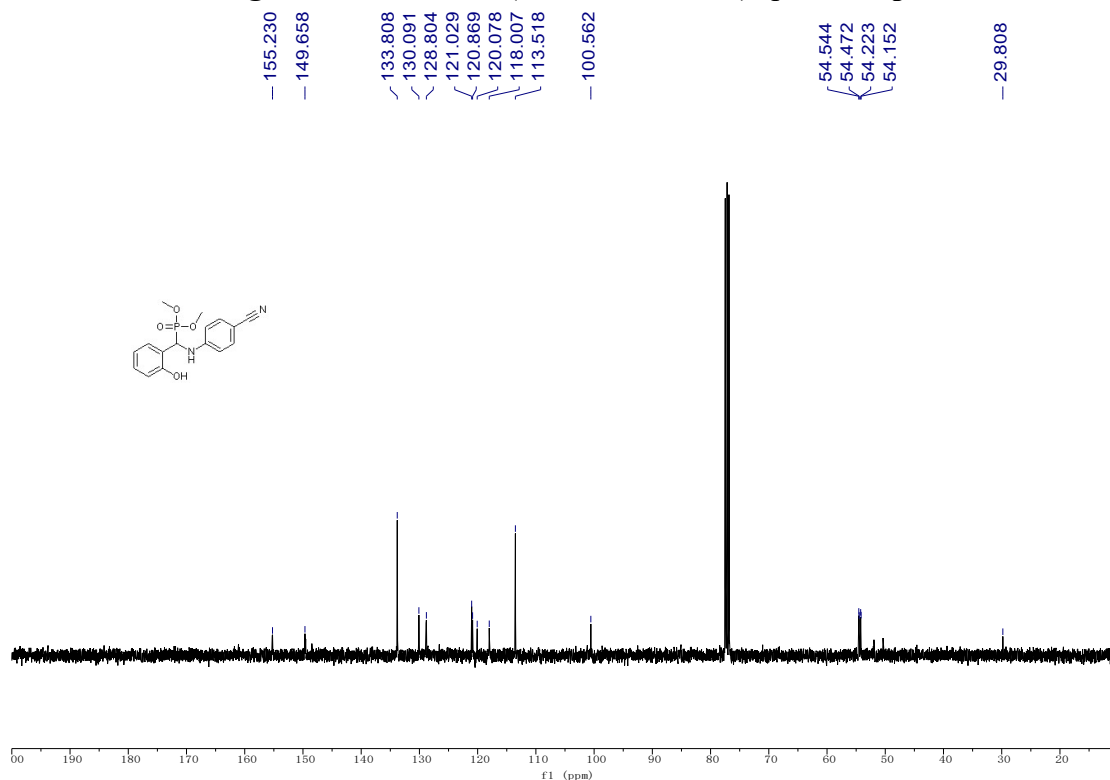

**Figure S48.** <sup>13</sup>C NMR (101 MHz, CDCl<sub>3</sub>) spectra of **p**

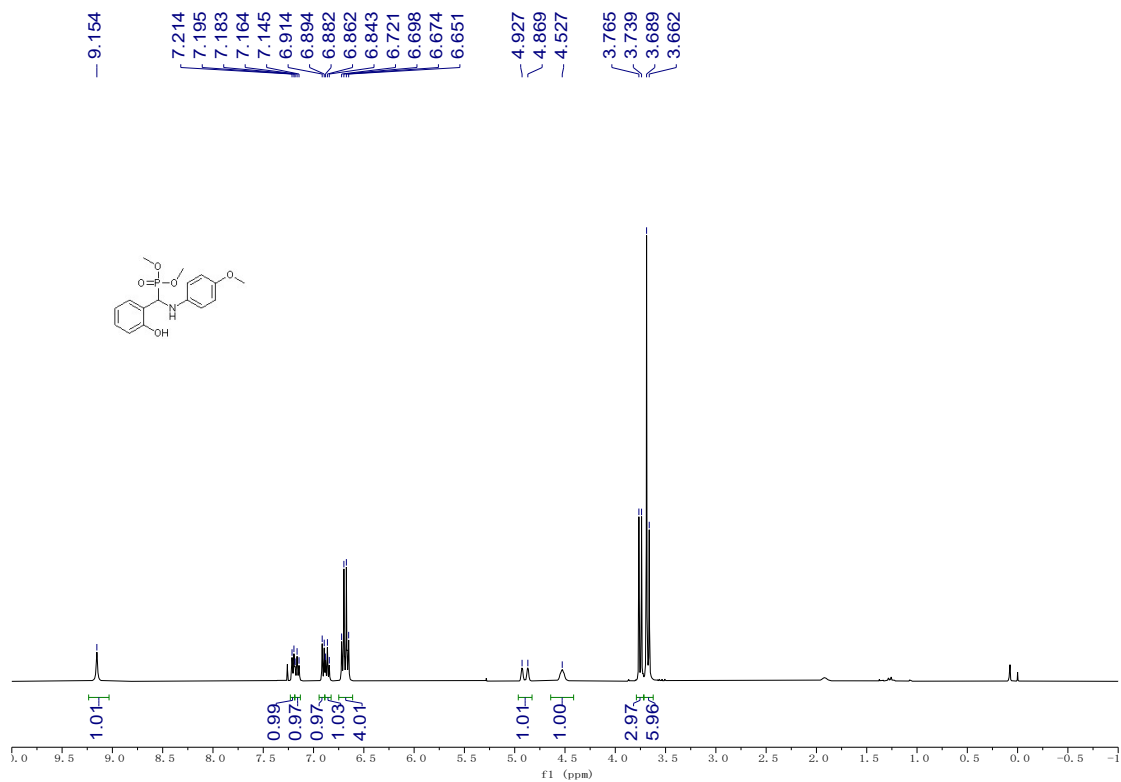

**Figure S49.** <sup>1</sup>H NMR (400 MHz, CDCl<sub>3</sub>) spectra of **q**

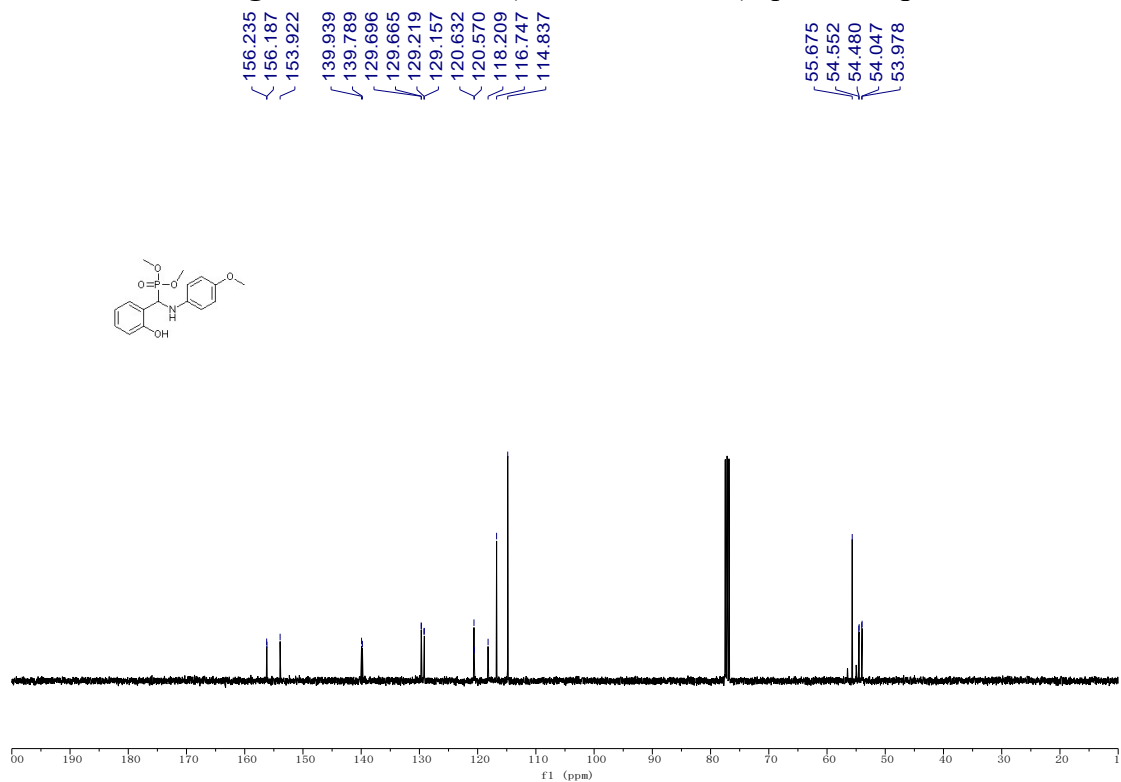

**Figure S50.** <sup>13</sup>C NMR (101 MHz, CDCl<sub>3</sub>) spectra of **q**

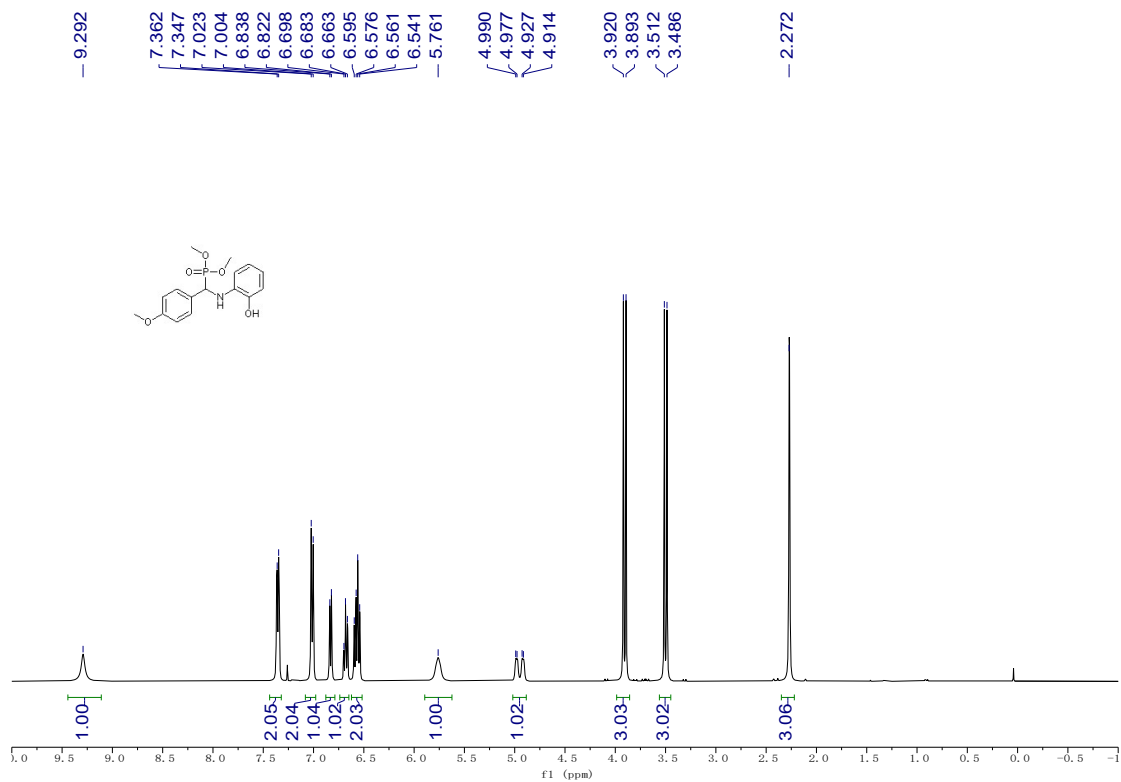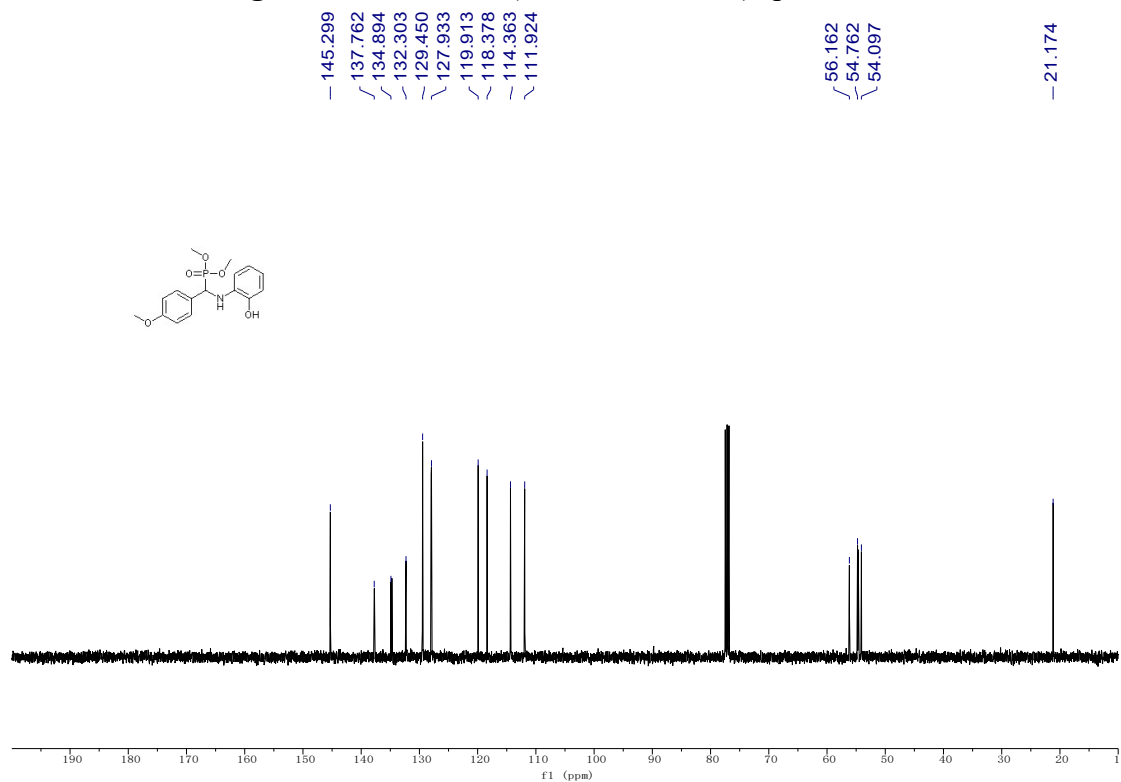

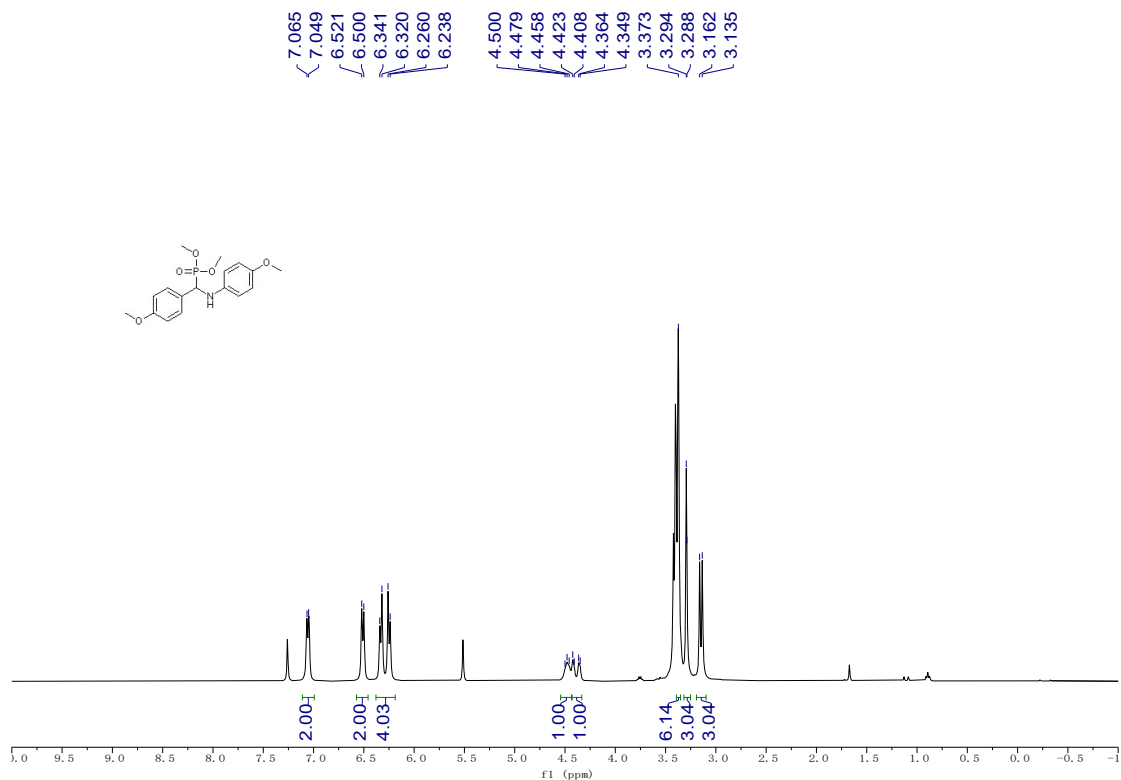

**Figure S53.** <sup>1</sup>H NMR (400 MHz, CDCl<sub>3</sub>) spectra of **s**

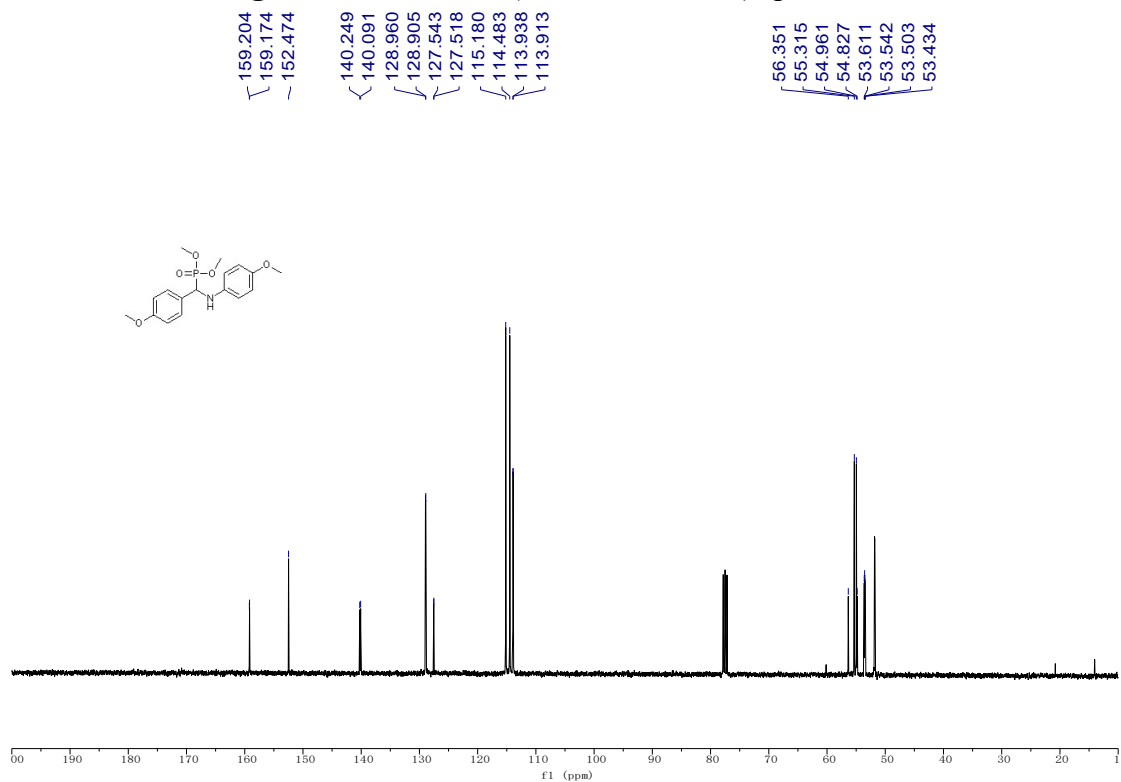

**Figure S54.** <sup>13</sup>C NMR (101 MHz, CDCl<sub>3</sub>) spectra of **s**



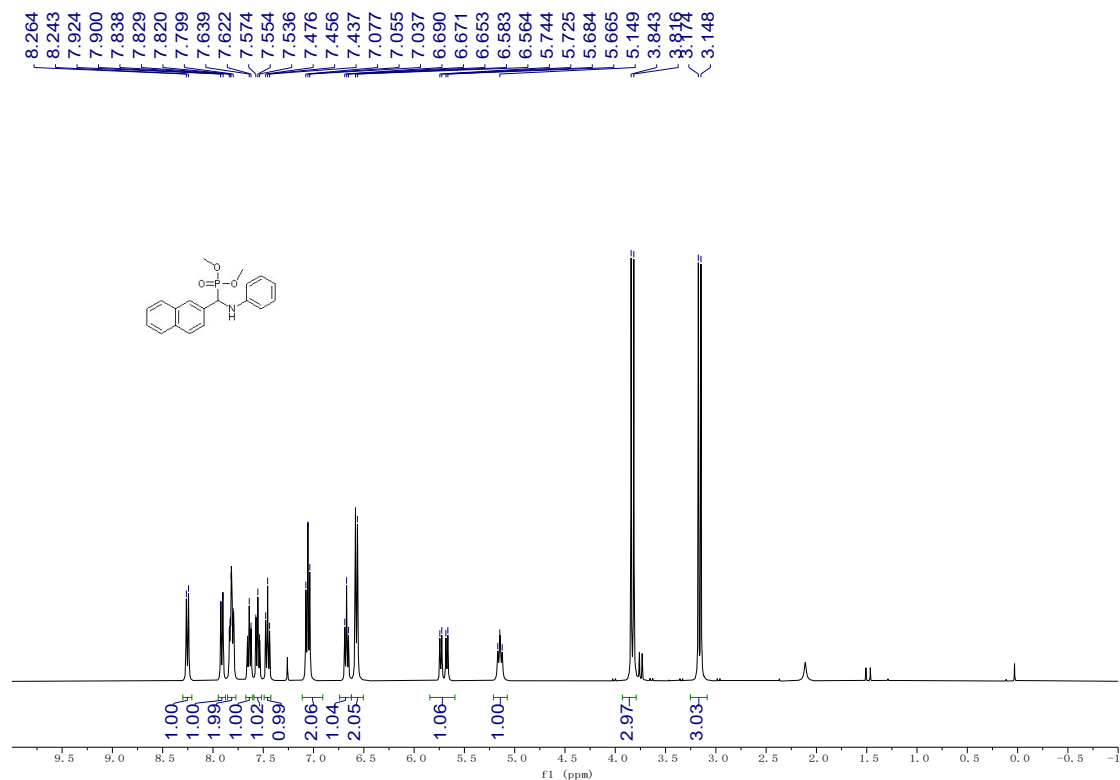

Figure S55. <sup>1</sup>H NMR (400 MHz, CDCl<sub>3</sub>) spectra of **t**

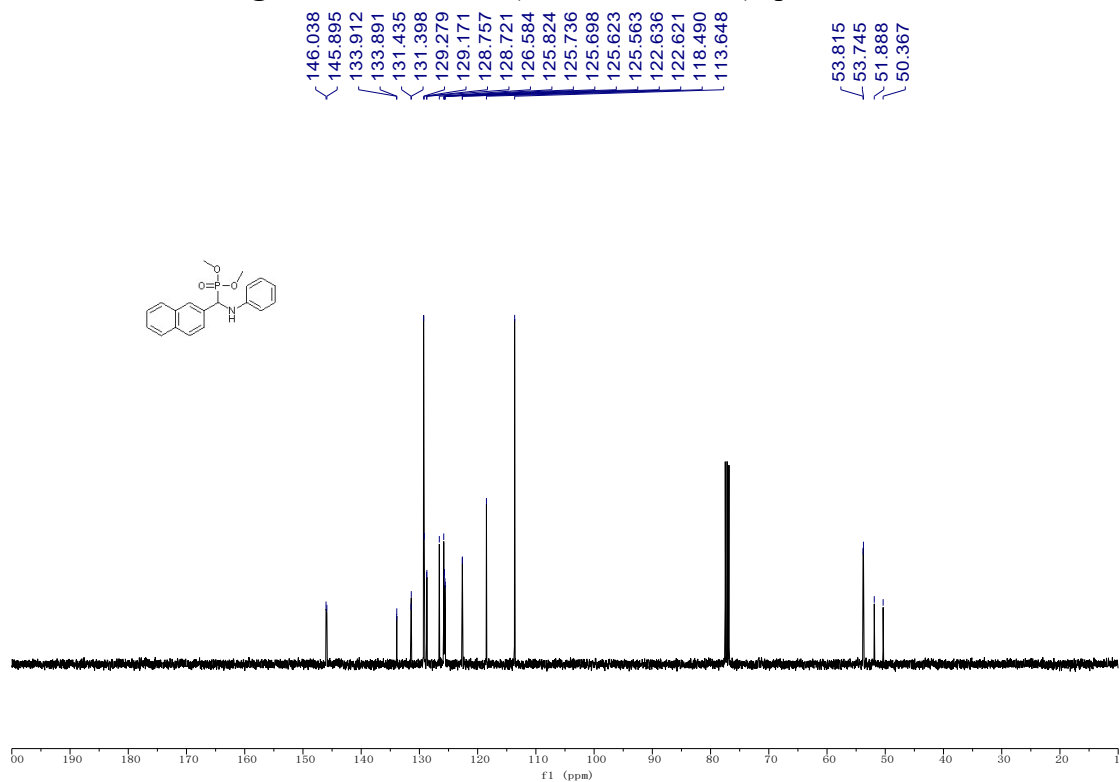

Figure S56. <sup>13</sup>C NMR (101 MHz, CDCl<sub>3</sub>) spectra of **t**

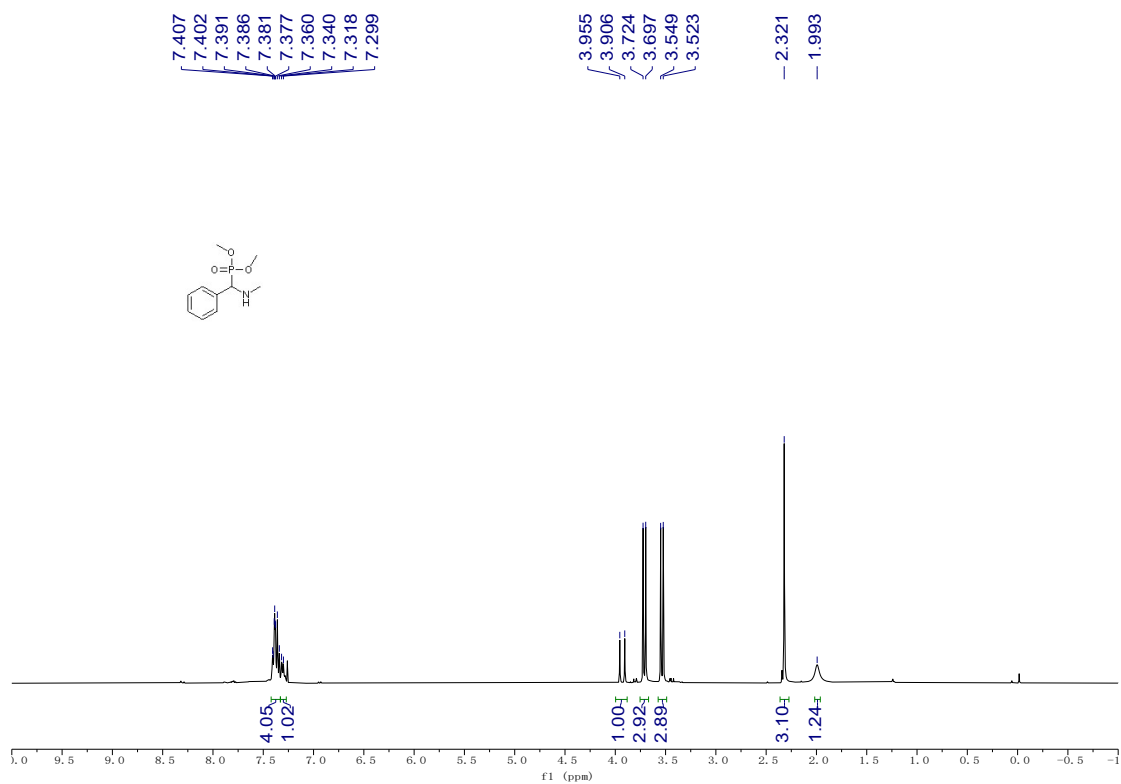

**Figure S57.** <sup>1</sup>H NMR (400 MHz, CDCl<sub>3</sub>) spectra of **u**

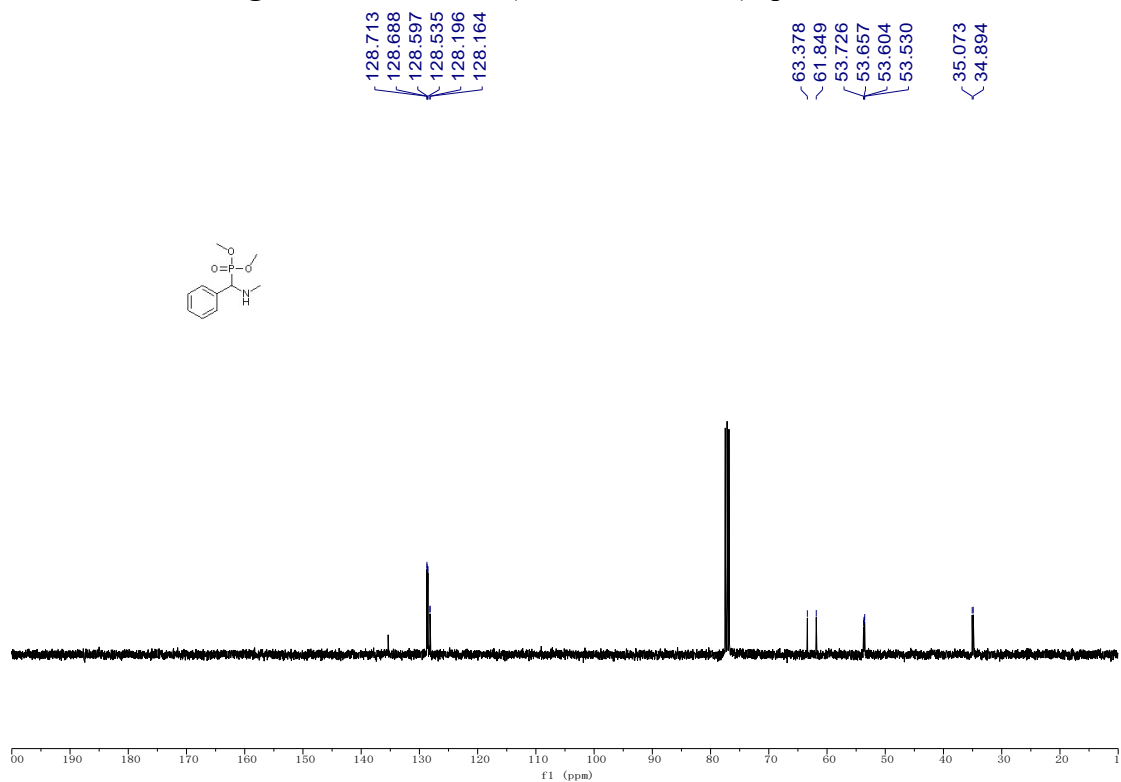

**Figure S58.** <sup>13</sup>C NMR (101 MHz, CDCl<sub>3</sub>) spectra of **u**

## IX. References

- 1 V. K. Pandey, C. S. Tiwari, A. Rit, *Chem. Asian. J.*, 2022, **17**, e202200703.
- 2 F. Malamiri, S. Khaksar, *Journal of Chemical Sciences.*, 2014, **126**, 807.
- 3 X. Jia, X. Liu, Y. Yuan, P. Li, W. Hou, K. He, *Chem. Asian. J.*, 2018, **13**, 1911.
- 4 P. Sreelakshmi, S. Santhisudha, R. G. Raghavendra, Y. Subbarao, K. Peddanna, C. Apparao, C. S. Reddy, *Synth. Commun.*, 2018, **48**, 1148.
- 5 S. Bhagat, A. K. Chakraborti, *J. Org. Chem.* 2007, **72**, 1263
